# Supplementary material
Source: PubMed Central journal article supplement (PMC5737129)

**Supplemental Table 1. System-Based Chronic and Late-Onset Medical Event Severity Grading in the St. Jude Lifetime Cohort Study**

| Organ/System                                                                     | Grading Source                                                                                                                                                                                                              | Grading Rubric                                                                                                                                                                                                                                                                                                                                                                                                                                                                              |
|----------------------------------------------------------------------------------|-----------------------------------------------------------------------------------------------------------------------------------------------------------------------------------------------------------------------------|---------------------------------------------------------------------------------------------------------------------------------------------------------------------------------------------------------------------------------------------------------------------------------------------------------------------------------------------------------------------------------------------------------------------------------------------------------------------------------------------|
| <b>Auditory-Hearing</b>                                                          |                                                                                                                                                                                                                             |                                                                                                                                                                                                                                                                                                                                                                                                                                                                                             |
| Cerumen impaction                                                                | CTCAEv4.03<br>Ear and labyrinth disorders:<br>Other, specify                                                                                                                                                                | 1: Asymptomatic or mild symptoms; clinical or diagnostic observations only; intervention not indicated<br>2: Moderate; minimal, local or non-invasive intervention indicated; limiting age appropriate instrumental ADL<br>3: Severe or medically significant but not immediately life threatening; hospitalization or prolongation of existing hospitalization indicated; disabling; limiting self-care ADL<br>4: Life-threatening consequences; urgent intervention indicated<br>5: Death |
| Cholesteatoma                                                                    | CTCAEv4.03<br>Ear and labyrinth disorders:<br>Other, specify                                                                                                                                                                | 1: Asymptomatic or mild symptoms; clinical or diagnostic observations only; intervention not indicated<br>2: Moderate; minimal, local or non-invasive intervention indicated; limiting age appropriate instrumental ADL<br>3: Severe or medically significant but not immediately life threatening; hospitalization or prolongation of existing hospitalization indicated; disabling; limiting self-care ADL<br>4: Life-threatening consequences; urgent intervention indicated<br>5: Death |
| Hearing loss<br><br>(Includes: sensorineural, conductive and mixed hearing loss) | <b>New grading source<br/>Modified Chang Ototoxicity<br/>Grading Scale</b><br><br>Chang KW, Chinosornvatana N. Practical grading system for evaluating cisplatin ototoxicity in children. J Clin Oncol 2010;28(10):1788-95. | <b>1: <math>\geq 40</math> dB at any frequency 6-12 kHz (Chang 1a); <math>&gt; 20</math> and <math>&lt; 40</math> dB at 4kHz (Chang 1b)</b><br><b>2: <math>\geq 40</math> dB at 4 kHz and above (Chang 2a); <math>&gt; 20</math> and <math>&lt; 40</math> dB at any frequency <math>&lt; 4</math>kHz (Chang 2b)</b><br><b>3: <math>\geq 40</math> dB at 2 or 3 kHz and above</b><br><b>4: <math>\geq 40</math> dB at 1 kHz and above</b><br><b>5: Not applicable</b>                        |
| Tinnitus                                                                         | CTCAEv4.03<br>Ear and labyrinth disorders:<br>Tinnitus                                                                                                                                                                      | 1: Mild symptoms; intervention not Indicated<br>2: Moderate symptoms; limiting instrumental ADL<br>3: Severe symptoms; limiting self-care ADL<br>4: Not applicable<br>5: Not applicable                                                                                                                                                                                                                                                                                                     |
| Vertigo<br><br>(Includes: Meniere's)                                             | CTCAEv4.03<br>Ear and labyrinth disorders:<br>Vertigo                                                                                                                                                                       | 1: Mild symptoms; intervention not Indicated<br>2: Moderate symptoms; limiting instrumental ADL<br>3: Severe symptoms; limiting self-care ADL<br>4: Not applicable<br>5: Not applicable                                                                                                                                                                                                                                                                                                     |

| Organ/System                                                                                                                                                                                                                                         | Grading Source                                                                                                                                    | Grading Rubric                                                                                                                                                                                                                                                                                                                                                                                                                                                                                                                                                                 |
|------------------------------------------------------------------------------------------------------------------------------------------------------------------------------------------------------------------------------------------------------|---------------------------------------------------------------------------------------------------------------------------------------------------|--------------------------------------------------------------------------------------------------------------------------------------------------------------------------------------------------------------------------------------------------------------------------------------------------------------------------------------------------------------------------------------------------------------------------------------------------------------------------------------------------------------------------------------------------------------------------------|
| <b>Cardiovascular</b>                                                                                                                                                                                                                                |                                                                                                                                                   |                                                                                                                                                                                                                                                                                                                                                                                                                                                                                                                                                                                |
| Aortic root <b>aneurysm</b>                                                                                                                                                                                                                          | <b>Modified</b><br>CTCAE v4.03<br>Cardiac Disorders:<br>Other, specify                                                                            | 1: Asymptomatic or mild symptoms; clinical or diagnostic observations only; intervention not indicated ( <b>aortic root &gt;= 3.5 cm to &lt; 4 cm</b> )<br>2: Moderate; minimal, local or noninvasive intervention indicated; limiting age appropriate instrumental ADL ( <b>aortic root &gt; = 4 cm</b> )<br>3: Severe or medically significant but not immediately life threatening; hospitalization or prolongation of existing hospitalization indicated; disabling; limiting self-care ADL<br>4: Life-threatening consequences; urgent intervention indicated<br>5: Death |
| Arteriovenous malformation                                                                                                                                                                                                                           | CTCAE v4.03<br>Cardiac Disorders:<br>Other, specify                                                                                               | 1: Asymptomatic or mild symptoms; clinical or diagnostic observations only; intervention not indicated<br>2: Moderate; minimal, local or noninvasive intervention indicated; limiting age appropriate instrumental ADL<br>3: Severe or medically significant but not immediately life threatening; hospitalization or prolongation of existing hospitalization indicated; disabling; limiting self-care ADL<br>4: Life-threatening consequences; urgent intervention indicated<br>5: Death                                                                                     |
| Atrioventricular heart block<br><br>(Includes: 1 <sup>st</sup> degree (PR> 200msec), 2 <sup>nd</sup> degree, Mobitz I, 2 <sup>nd</sup> degree, Mobitz II, 3 <sup>rd</sup> degree (complete) Bundle branch block, QRS > 120ms, Stokes-Adams Syndrome) | CTCAE v4.03<br>Cardiac Disorders:<br>AV Block first degree (grades 1&2); AV block complete; Mobitz (type) II AV block; Mobitz type I (grades 3&4) | 1: Asymptomatic; intervention not indicated<br>2: Symptomatic; non-urgent medical intervention indicated<br>3: Symptomatic and incompletely controlled medically, or controlled with device (e.g., pacemaker)<br>4: Life-threatening consequences; urgent intervention indicated<br>5: Death                                                                                                                                                                                                                                                                                   |
| Bradycardia, sinus                                                                                                                                                                                                                                   | <b>Modified</b><br>(definition HR < 50/minute)<br>CTCAE v4.03<br>Cardiac Disorders:<br>Sinus bradycardia                                          | 1: Asymptomatic; intervention not indicated<br>2: Symptomatic; medical intervention indicated<br>3: Severe; medically significant, medical intervention indicated<br>4: Life-threatening consequences; urgent intervention indicated<br>5: Death                                                                                                                                                                                                                                                                                                                               |
| Conduction abnormalities<br><br>(Includes: Sick Sinus Syndrome, Wolff-Parkinson-White syndrome)                                                                                                                                                      | <b>Modified</b><br>CTCAE v4.03<br>Cardiac Disorders:<br>Conduction disorder                                                                       | 1: <b>Asymptomatic or</b> mild symptoms; intervention not indicated<br>2: Moderate symptoms; <b>non-urgent intervention indicated</b><br>3: Severe symptoms; intervention indicated<br>4: Life-threatening consequences; urgent intervention indicated<br>5: Death                                                                                                                                                                                                                                                                                                             |
| Congestive heart failure                                                                                                                                                                                                                             | <b>Modified</b><br>CTCAE v4.03<br>Cardiac Disorders:<br>Heart failure                                                                             | 1: Asymptomatic with laboratory (e.g., BNP) or cardiac imaging abnormalities ( <b>NYHA I</b> )<br>2: Symptoms with mild to moderate activity or exertion ( <b>NYHA II</b> )<br>3: Severe with symptoms at rest or with minimal activity or exertion; intervention indicated ( <b>NYHA III</b> )<br>4: Life-threatening consequences; urgent intervention indicated (e.g., continuous IV therapy or mechanical hemodynamic support ( <b>NYHA IV</b> )<br>5: Death                                                                                                               |

| Organ/System                                                                                                                                              | Grading Source                                                                                                                                       | Grading Rubric                                                                                                                                                                                                                                                                                                                                                                                                                            |
|-----------------------------------------------------------------------------------------------------------------------------------------------------------|------------------------------------------------------------------------------------------------------------------------------------------------------|-------------------------------------------------------------------------------------------------------------------------------------------------------------------------------------------------------------------------------------------------------------------------------------------------------------------------------------------------------------------------------------------------------------------------------------------|
| Coronary artery disease<br><br>(Includes myocardial infarction)                                                                                           | <b>Modified</b><br>CTCAE v4.03<br>Cardiac Disorders:<br>Myocardial infarction                                                                        | 1: <b>Asymptomatic; clinical or diagnostic observations only; intervention not indicated</b><br>2: <b>Mild symptoms</b> and cardiac enzymes minimally abnormal and no evidence of ischemic ECG changes<br>3: Severe symptoms; cardiac enzymes abnormal; hemodynamically stable; ECG changes consistent with infarction ( <b>Q waves</b> )<br>4: Life-threatening consequences; hemodynamically unstable (CABG or angioplasty)<br>5: Death |
| Cor pulmonale (right heart failure)                                                                                                                       | CTCAE v4.03<br>Cardiac Disorders:<br>Right ventricular dysfunction                                                                                   | 1: Asymptomatic with laboratory (e.g., BNP) or cardiac imaging abnormalities<br>2: Symptoms with mild to moderate activity or exertion<br>3: Severe symptoms, associated with hypoxia, right heart failure; oxygen indicated<br>4: Life-threatening consequences; urgent intervention indicated (e.g., ventricular assist device); heart transplant indicated<br>5: Death                                                                 |
| Dysrhythmia<br><br>(Includes: atrial fibrillation, atrial flutter, SVA, SVT, PAT; ventricular arrhythmia, and lethal arrhythmia requiring defibrillation) | CTCAE v4.03<br>Cardiac Disorders:<br>Atrial fibrillation                                                                                             | 1: Asymptomatic, intervention not indicated<br>2: Non-urgent medical intervention indicated<br>3: Symptomatic and incompletely controlled medically, or controlled with device (e.g., pacemaker), or ablation<br>4: Life-threatening consequences; urgent intervention indicated<br>5: Death                                                                                                                                              |
| Heart valve disorder                                                                                                                                      | <b>Modified</b><br>CTCAE v4.03<br>Cardiac Disorders:<br>Aortic valve disease; mitral valve disease; pulmonary valve disease; tricuspid valve disease | 1: Asymptomatic valvular thickening/ <b>calcifications</b> with or without mild valvular regurgitation or stenosis by imaging<br>2: Asymptomatic; moderate regurgitation or stenosis by imaging<br>3: Symptomatic; severe regurgitation or stenosis by imaging; symptoms controlled with medical intervention<br>4: Life-threatening consequences; urgent intervention indicated (e.g., valve replacement, valvuloplasty)<br>5: Death     |
| High total cholesterol                                                                                                                                    | <b>Modified</b><br>CTCAE v4.03<br>Investigations:<br>Cholesterol high                                                                                | 1: <b>&gt;200 mg/dL</b> - 300 mg/dL<br>2: >300 - 400 mg/dL; <b>treatment with one lipid lowering agent</b><br>3: >400 - 500 mg/dL; <b>treatment with &gt;=2 lipid lowering agent</b><br>4: >500 mg/dL<br>5: Not applicable                                                                                                                                                                                                                |

| Organ/System                                                       | Grading Source                                                                                                                                                                                                                                        | Grading Rubric                                                                                                                                                                                                                                                                                                                                                                                                                                                                                                                       |                                                                                                                                                                                                                                                                                                    |
|--------------------------------------------------------------------|-------------------------------------------------------------------------------------------------------------------------------------------------------------------------------------------------------------------------------------------------------|--------------------------------------------------------------------------------------------------------------------------------------------------------------------------------------------------------------------------------------------------------------------------------------------------------------------------------------------------------------------------------------------------------------------------------------------------------------------------------------------------------------------------------------|----------------------------------------------------------------------------------------------------------------------------------------------------------------------------------------------------------------------------------------------------------------------------------------------------|
| Hypertension (from resting blood pressure)                         | <p><b>Modified</b><br/>CTCAE v4.03<br/>Vascular Disorders:<br/>Hypertension</p> <p>National High Blood Pressure Education Program Working Group on High Blood Pressure in Children and Adolescents. Pediatrics. 2004;114(2 Suppl 4th Report):555.</p> | <p><b>Adult</b></p> <p>1: Prehypertension (systolic BP 120 - 139 mm Hg or diastolic BP 80 - 89 mm Hg)</p>                                                                                                                                                                                                                                                                                                                                                                                                                            | <p><b>Pediatrics</b></p> <p>1: <b>Prehypertension (systolic and/or diastolic BP <math>\geq</math> 90th percentile but <math>&lt;</math> 95th percentile for gender, age and height, or if in adolescents BP exceeds 120/80 mmHg even if <math>&lt;</math>90th percentile)</b></p>                  |
|                                                                    |                                                                                                                                                                                                                                                       | <p>2: Stage 1 hypertension (systolic BP 140 - 159 mm Hg or diastolic BP 90 - 99 mm Hg); medical intervention indicated <b>or initiated</b>; recurrent or persistent (<math>\geq</math>24 hrs); symptomatic increase by <math>&gt;</math>20 mm Hg (diastolic) or to <math>&gt;</math>140/90 mm Hg if previously WNL; monotherapy indicated <b>or initiated</b></p>                                                                                                                                                                    | <p>2: Stage 1 hypertension (<b>systolic and/or diastolic BP between the 95th percentile and 5 mmHg above the 99th percentile for gender, age and height, or if in adolescents the BP exceeds 140/90 mmHg even <math>&lt;</math>95th percentile</b>); monotherapy indicated <b>or initiated</b></p> |
|                                                                    |                                                                                                                                                                                                                                                       | <p>3: Stage 2 hypertension (systolic BP <math>\geq</math>160 mm Hg or diastolic BP <math>\geq</math>100 mm Hg); medical intervention indicated; more than one drug or more intensive therapy than previously used indicated <b>or initiated</b></p>                                                                                                                                                                                                                                                                                  | <p>3: Stage 2 hypertension (<b>systolic and/or diastolic BP <math>\geq</math>99th percentile plus 5 mmHg for gender, age, and height</b>); more than one drug or more intensive therapy than previously used indicated <b>or initiated</b></p>                                                     |
|                                                                    |                                                                                                                                                                                                                                                       | <p>4: Life-threatening consequences (e.g., malignant hypertension, transient or permanent neurologic deficit, hypertensive crisis); urgent intervention indicated</p>                                                                                                                                                                                                                                                                                                                                                                | <p>4: Life-threatening consequences (e.g., malignant hypertension, transient or permanent neurologic deficit, hypertensive crisis); urgent intervention indicated</p>                                                                                                                              |
|                                                                    |                                                                                                                                                                                                                                                       | <p>5: Death</p>                                                                                                                                                                                                                                                                                                                                                                                                                                                                                                                      | <p>5: Death</p>                                                                                                                                                                                                                                                                                    |
| Hypertriglyceridemia                                               | <p><b>Modified</b><br/>CTCAE v4.03<br/>Metabolism and Nutrition Disorders:<br/>Hypertriglyceridemia</p>                                                                                                                                               | <p>1: 150 mg/dL - 300 mg/dL<br/>2: <math>&gt;</math>300 mg/dL - 500 mg/dL; <b>treatment with one lipid lowering agent</b><br/>3: <math>&gt;</math>500 mg/dL - 1000 mg/dL; <b>treatment with <math>\geq</math>2 lipid lowering agents</b><br/>4: <math>&gt;</math>1000 mg/dL; life-threatening consequences<br/>5: Death</p>                                                                                                                                                                                                          |                                                                                                                                                                                                                                                                                                    |
| Left ventricular systolic dysfunction<br>(Includes cardiomyopathy) | <p><b>Modified</b><br/>CTCAE v4.03<br/>Investigations:<br/>Ejection fraction decreased (grades 2&amp;3)<br/>Left ventricular systolic dysfunction (grade 4)</p>                                                                                       | <p>1: Not applicable<br/>2: <b>Resting EF <math>&lt;</math> 50-40%</b>; 10 - 19% <b>absolute</b> drop from baseline<br/>3: Resting EF 39-20%; <math>&gt;</math>20% <b>absolute</b> drop from baseline; <b>medication indicated or initiated</b><br/>4: Resting EF<math>&lt;</math>20%; refractory or poorly controlled heart failure due to drop in ejection fraction; <b>on medical management</b>; intervention such as ventricular assist device, intravenous vasopressor support, or heart transplant indicated<br/>5: Death</p> |                                                                                                                                                                                                                                                                                                    |
| Pericarditis                                                       | <p><b>Modified</b><br/>CTCAE v4.03<br/>Cardiac Disorders:<br/>Pericarditis</p>                                                                                                                                                                        | <p>1: Asymptomatic, ECG or physical findings (e.g., rub) consistent with pericarditis<br/>2: Symptomatic pericarditis (e.g., chest pain)<br/>3: Pericarditis with physiologic consequences (e.g., pericardial constriction)<br/>4: Life-threatening consequences; urgent intervention indicated (<b>e.g., cardiac tamponade</b>)<br/>5: Death</p>                                                                                                                                                                                    |                                                                                                                                                                                                                                                                                                    |

| Organ/System                           | Grading Source                                                                                           | Grading Rubric                                                                                                                                                                                                                                                                                                                                                                                                                                                                             |
|----------------------------------------|----------------------------------------------------------------------------------------------------------|--------------------------------------------------------------------------------------------------------------------------------------------------------------------------------------------------------------------------------------------------------------------------------------------------------------------------------------------------------------------------------------------------------------------------------------------------------------------------------------------|
| Prolonged QTcorrected (QTc) interval   | <b>Modified</b><br>CTCAE v4.03<br>Investigations:<br>Prolonged QTc interval                              | 1: QTc <b>460 - 480 ms (men); 470-480 ms (women)</b><br>2: QTc 481 - 500 ms<br>3: QTc >= 501 ms on >= two separate ECGs<br>4: QTc >= 501 or >60 ms change from baseline and Torsade de pointes or polymorphic ventricular tachycardia or signs/symptoms of serious arrhythmia<br>5: Not applicable                                                                                                                                                                                         |
| Pulmonary hypertension                 | CTCAE v4.03<br>Respiratory, thoracic, and mediastinal disorders:<br>Pulmonary hypertension               | 1: Minimal dyspnea; findings on physical exam or other evaluation<br>2: Moderate dyspnea, cough; requiring evaluation by cardiac catheterization and medical intervention<br>3: Severe symptoms, associated with hypoxemia, right heart failure; oxygen indicated<br>4: Life-threatening airway consequences; urgent intervention indicated (e.g., tracheotomy or intubation)<br>5: Death                                                                                                  |
| Raynaud phenomenon                     | CTCAE v4.03<br>Vascular Disorders:<br>Other, specify                                                     | 1: Asymptomatic or mild symptoms; clinical or diagnostic observations only; intervention not indicated<br>2: Moderate; minimal, local or noninvasive intervention indicated; limiting age appropriate instrumental ADL<br>3: Severe or medically significant but not immediately life threatening; hospitalization or prolongation of existing hospitalization indicated; disabling; limiting self-care ADL<br>4: Life-threatening consequences; urgent intervention indicated<br>5: Death |
| Right ventricular systolic dysfunction | <b>Modified</b><br>CTCAE v4.03<br>Cardiac Disorders:<br>Right ventricular dysfunction                    | 1: <b>Asymptomatic cardiac imaging abnormalities</b><br>2: Symptoms with mild to moderate activity or exertion<br>3: Severe symptoms, associated with hypoxia, right heart failure; oxygen indicated<br>4: Life-threatening consequences; urgent intervention indicated (e.g., ventricular assist device); heart transplant indicated<br>5: Death                                                                                                                                          |
| Tachycardia, sinus                     | <b>Modified (definition HR &gt;110/minute)</b><br>CTCAE v4.03<br>Cardiac Disorders:<br>Sinus tachycardia | 1: Asymptomatic, intervention not indicated<br>2: Symptomatic; non-urgent medical intervention indicated<br>3: Urgent medical intervention indicated<br>4: Not applicable<br>5: Not applicable                                                                                                                                                                                                                                                                                             |
| Thrombus                               | CTCAE v4.03<br>Vascular Disorders:<br>Thromboembolic event                                               | 1: Venous thrombosis (e.g., superficial thrombosis)<br>2: Venous thrombosis (e.g., uncomplicated deep vein thrombosis), medical intervention indicated<br>3: Thrombosis (e.g., non-embolic cardiac mural [arterial] thrombus), medical intervention indicated<br>4: Life-threatening (e.g., cerebrovascular event, arterial insufficiency); hemodynamic or neurologic instability; urgent intervention indicated<br>5: Death                                                               |

| Organ/System                                                                                                                                   | Grading Source                                                                               | Grading Rubric                                                                                                                                                                                                                                                                                                                                                                                                                                                                             |
|------------------------------------------------------------------------------------------------------------------------------------------------|----------------------------------------------------------------------------------------------|--------------------------------------------------------------------------------------------------------------------------------------------------------------------------------------------------------------------------------------------------------------------------------------------------------------------------------------------------------------------------------------------------------------------------------------------------------------------------------------------|
| Vascular disease<br><br>(Stenosis/occlusion of vessel other than coronary or cerebral vessels, e.g., carotid, subclavian)                      | CTCAE v4.03<br>Vascular Disorders<br>Other, specify                                          | 1: Asymptomatic or mild symptoms; clinical or diagnostic observations only; intervention not indicated<br>2: Moderate; minimal, local or noninvasive intervention indicated; limiting age appropriate instrumental ADL<br>3: Severe or medically significant but not immediately life threatening; hospitalization or prolongation of existing hospitalization indicated; disabling; limiting self-care ADL<br>4: Life-threatening consequences; urgent intervention indicated<br>5: Death |
| <b>Endocrine</b>                                                                                                                               |                                                                                              |                                                                                                                                                                                                                                                                                                                                                                                                                                                                                            |
| Abnormal glucose metabolism<br><br>(Includes: impaired fasting glucose, insulin resistance with impaired glucose tolerance, diabetes mellitus) | <b>Modified</b><br>CTCAE v4.03<br>Metabolism and nutrition disorders:<br>Glucose intolerance | 1: Asymptomatic; clinical or diagnostic observations only; <b>pharmacologic</b> intervention not indicated <b>or initiated (e.g. dietary modification)</b><br>2: Symptomatic; oral agent indicated <b>or initiated</b><br>3: Severe symptoms; insulin indicated <b>or initiated</b><br>4: Life threatening consequences, urgent intervention indicated <b>or initiated</b><br>5: Death                                                                                                     |
| Adrenal insufficiency                                                                                                                          | <b>Modified</b><br>CTCAE v4.03<br>Endocrine disorders:<br>Adrenal insufficiency              | 1: Asymptomatic; clinical or diagnostic observations only; <b>intervention indicated during periods of stress</b><br>2: Moderate symptoms; <b>daily maintenance indicated (i.e. am cortisol &lt; 5 mcg/dL) or initiated</b><br>3: Severe symptoms; hospitalization indicated<br>4: Life-threatening consequences; urgent intervention indicated<br>5: Death                                                                                                                                |
| Adult growth hormone deficiency                                                                                                                | <b>Modified</b><br>CTCAE v4.03<br>Investigations:<br>Growth hormone abnormal                 | 1: Asymptomatic; clinical or diagnostic observations only; intervention not <b>indicated (IGF-1 z-score &lt; -2 in isolation or abnormal dynamic test with decision not to pursue treatment)</b><br>2: Symptomatic; medical intervention indicated; limiting instrumental ADL<br>3: Not applicable<br>4: Not applicable<br>5: Not applicable                                                                                                                                               |
| Childhood growth hormone deficiency<br><br>(Based on dynamic testing in survivors who have not completed growth)                               | <b>Modified</b><br>CTCAE v4.03<br>Investigations:<br>Growth hormone abnormal                 | 1: Asymptomatic; clinical or diagnostic observations only; intervention not indicated <b>(abnormal dynamic test with decision not to pursue treatment)</b><br>2: Symptomatic; medical intervention indicated; limiting instrumental ADL<br>3: Not applicable<br>4: Not applicable<br>5: Not applicable                                                                                                                                                                                     |
| Diabetes insipidus                                                                                                                             | CTCAE v4.03<br>Endocrine disorders:<br>Other, specify                                        | 1: Asymptomatic or mild symptoms; clinical or diagnostic observations only; intervention not indicated<br>2: Moderate; minimal, local or noninvasive intervention indicated; limiting age-appropriate instrumental ADL<br>3: Severe or medically significant but not immediately life-threatening; hospitalization or prolongation of existing hospitalization indicated; disabling; limiting self-care ADL<br>4: Life-threatening consequences; urgent intervention indicated<br>5: Death |

| Organ/System                                            | Grading Source                                                                                                    | Grading Rubric                                                                                                                                                                                                                                                                                                                                                                                                                                                                                   |                                                                                                                                                                                                                                                      |
|---------------------------------------------------------|-------------------------------------------------------------------------------------------------------------------|--------------------------------------------------------------------------------------------------------------------------------------------------------------------------------------------------------------------------------------------------------------------------------------------------------------------------------------------------------------------------------------------------------------------------------------------------------------------------------------------------|------------------------------------------------------------------------------------------------------------------------------------------------------------------------------------------------------------------------------------------------------|
| Growth hormone excess                                   | CTCAE v4.03<br>Endocrine disorders:<br>Other, specify                                                             | 1: Asymptomatic or mild symptoms; clinical or diagnostic observations only; intervention not indicated<br>2: Moderate; minimal, local or noninvasive intervention indicated; limiting age-appropriate instrumental ADL<br>3: Death Severe or medically significant but not immediately life-threatening; hospitalization or prolongation of existing hospitalization indicated; disabling; limiting self-care ADL<br>4: Life-threatening consequences; urgent intervention indicated<br>5: Death |                                                                                                                                                                                                                                                      |
| Hyperparathyroidism                                     | <b>Modified</b><br>CTCAE v4.03<br>Endocrine disorders:<br>Hyperparathyroidism                                     | 1: Mild symptoms; intervention not indicated<br>2: Moderate symptoms; medical intervention indicated <b>or initiated</b><br>3: Not applicable<br>4: Not applicable<br>5: Not applicable                                                                                                                                                                                                                                                                                                          |                                                                                                                                                                                                                                                      |
| Hyperprolactinemia                                      | CTCAE v4.03<br>Endocrine disorders:<br>Other, specify                                                             | 1: Asymptomatic or mild symptoms; clinical or diagnostic observations only; intervention not indicated<br>2: Moderate; minimal, local or noninvasive intervention indicated; limiting age-appropriate instrumental ADL<br>3: Death Severe or medically significant but not immediately life-threatening; hospitalization or prolongation of existing hospitalization indicated; disabling; limiting self-care ADL<br>4: Life-threatening consequences; urgent intervention indicated<br>5: Death |                                                                                                                                                                                                                                                      |
| Hyperthyroidism                                         | <b>Modified</b><br>CTCAE v4.03<br>Endocrine disorders:<br>Hyperthyroidism                                         | 1: Asymptomatic; clinical or diagnostic observations only; intervention not indicated<br>2: Symptomatic; thyroid suppression indicated <b>or initiated</b> ; limiting instrumental ADL<br>3: Severe symptoms; limiting self-care ADL; hospitalization indicated<br>4: Life-threatening consequences; urgent intervention indicated<br>5: Death                                                                                                                                                   |                                                                                                                                                                                                                                                      |
| Hypoparathyroidism                                      | <b>Modified</b><br>CTCAE v4.03<br>Endocrine disorders:<br>Hypoparathyroidism                                      | 1: Asymptomatic; clinical or diagnostic observations only; intervention not indicated<br>2: Moderate symptoms; medical intervention indicated <b>or initiated</b><br>3: Severe symptoms; medical intervention or hospitalization indicated<br>4: Life-threatening consequences; urgent intervention indicated<br>5: Death                                                                                                                                                                        |                                                                                                                                                                                                                                                      |
| Hypothyroidism<br>(Includes compensated hypothyroidism) | <b>Modified</b><br>CTCAE v4.03<br>Endocrine disorders:<br>Hypothyroidism                                          | 1: Asymptomatic; clinical or diagnostic observations only; intervention not indicated <b>(compensated hypothyroidism)</b><br>2: Symptomatic; thyroid replacement indicated <b>or initiated</b> ; limiting instrumental ADL<br>3: Severe symptoms; limiting self-care ADL; hospitalization indicated<br>4: Life-threatening consequences; urgent intervention indicated<br>5: Death                                                                                                               |                                                                                                                                                                                                                                                      |
| Overweight/Obesity                                      | <b>New grading source for &lt; 20 years</b><br>Criteria per Centers for Disease Control and Prevention guidelines | For age $\geq 20$ years<br>1: Not applicable<br>2: BMI 25 - 29.9 kg/m <sup>2</sup><br>3: BMI 30 - 39.9 kg/m <sup>2</sup><br>4: BMI $\geq 40$ kg/m <sup>2</sup><br>5: Not applicable                                                                                                                                                                                                                                                                                                              | <b>For age 2 - &lt;20 years</b><br><b>1: Not applicable</b><br><b>2: BMI <math>\geq 85^{\text{th}}</math>ile &lt;95<sup>th</sup>ile</b><br><b>3: BMI <math>\geq 95^{\text{th}}</math>ile</b><br><b>4: Not applicable</b><br><b>5: Not applicable</b> |

| Organ/System                                                                                                                 | Grading Source                                                                                               | Grading Rubric                                                                                                                                                                                                                                                                                                                                                                                                                                                                                   |                                                                                                                                                                                           |
|------------------------------------------------------------------------------------------------------------------------------|--------------------------------------------------------------------------------------------------------------|--------------------------------------------------------------------------------------------------------------------------------------------------------------------------------------------------------------------------------------------------------------------------------------------------------------------------------------------------------------------------------------------------------------------------------------------------------------------------------------------------|-------------------------------------------------------------------------------------------------------------------------------------------------------------------------------------------|
| Syndrome of inappropriate antidiuretic hormone secretion                                                                     | CTCAE v4.03<br>Endocrine disorders:<br>Other, specify                                                        | 1: Asymptomatic or mild symptoms; clinical or diagnostic observations only; intervention not indicated<br>2: Moderate; minimal, local or noninvasive intervention indicated; limiting age-appropriate instrumental ADL<br>3: Death Severe or medically significant but not immediately life-threatening; hospitalization or prolongation of existing hospitalization indicated; disabling; limiting self-care ADL<br>4: Life-threatening consequences; urgent intervention indicated<br>5: Death |                                                                                                                                                                                           |
| Underweight                                                                                                                  | <b>New category and grading source</b><br>Criteria per Centers for Disease Control and Prevention guidelines | <b>For age &gt;= 20 years</b><br>1: <b>Not applicable</b><br>2: <b>BMI &lt; 18.5 kg/m2</b><br>3: <b>Not applicable</b><br>4: <b>Not applicable</b><br>5: <b>Not applicable</b>                                                                                                                                                                                                                                                                                                                   | <b>For age 2 -&lt; 20 years</b><br>1: <b>Not applicable</b><br>2: <b>BMI &lt; 5<sup>th</sup> %ile</b><br>3: <b>Not applicable</b><br>4: <b>Not applicable</b><br>5: <b>Not applicable</b> |
| <b>Gastrointestinal</b>                                                                                                      |                                                                                                              |                                                                                                                                                                                                                                                                                                                                                                                                                                                                                                  |                                                                                                                                                                                           |
| Bowel perforation                                                                                                            | CTCAEv4.03<br>Gastrointestinal disorders:<br>Small intestinal perforation                                    | 1: Not applicable<br>2: Symptomatic; medical intervention indicated<br>3: Severe symptoms; elective operative intervention indicated<br>4: Life-threatening consequences; urgent operative intervention indicated<br>5: Death                                                                                                                                                                                                                                                                    |                                                                                                                                                                                           |
| Celiac disease                                                                                                               | CTCAEv4.03<br>Gastrointestinal disorders:<br>Other, specify                                                  | 1: Asymptomatic or mild symptoms; clinical or diagnostic observations only; intervention not indicated<br>2: Moderate; minimal, local or noninvasive intervention indicated; limiting age-appropriate instrumental ADL<br>3: Severe or medically significant but not immediately life-threatening; hospitalization or prolongation of existing hospitalization indicated; disabling; limiting self-care ADL<br>4: Life-threatening consequences; urgent intervention indicated<br>5: Death       |                                                                                                                                                                                           |
| Dysphagia                                                                                                                    | CTCAEv4.03<br>Gastrointestinal disorders:<br>Dysphagia                                                       | 1: Symptomatic, able to eat regular diet<br>2: Symptomatic and altered eating or swallowing<br>3: Severely altered eating or swallowing; tube feeding or TPN or hospitalization indicated<br>4: Life-threatening consequences; urgent intervention indicated<br>5: Death                                                                                                                                                                                                                         |                                                                                                                                                                                           |
| Enterocolitis<br>(Includes: ileitis, typhlitis, colitis, enterocolitis, diverticulitis, Crohn's disease, ulcerative colitis) | CTCAEv4.03<br>Gastrointestinal disorders:<br>Enterocolitis                                                   | 1: Asymptomatic; clinical or diagnostic observations only; intervention not indicated<br>2: Abdominal pain; mucus or blood in stool<br>3: Severe or persistent abdominal pain; fever; ileus; peritoneal signs<br>4: Life-threatening consequences; urgent intervention indicated<br>5: Death                                                                                                                                                                                                     |                                                                                                                                                                                           |
| Esophageal varices                                                                                                           | CTCAEv4.03<br>Gastrointestinal disorders:<br>Esophageal varices                                              | 1: Not applicable<br>2: Self-limited; intervention not indicated<br>3: Transfusion, radiologic, endoscopic, or elective operative intervention indicated<br>4: Life-threatening consequences; urgent intervention indicated<br>5: Death                                                                                                                                                                                                                                                          |                                                                                                                                                                                           |



| Organ/System                    | Grading Source                                                                                             | Grading Rubric                                                                                                                                                                                                                                                                                                                                                    |
|---------------------------------|------------------------------------------------------------------------------------------------------------|-------------------------------------------------------------------------------------------------------------------------------------------------------------------------------------------------------------------------------------------------------------------------------------------------------------------------------------------------------------------|
| Esophagitis                     | CTCAEv4.03<br>Gastrointestinal disorders:<br>Esophagitis                                                   | 1: Asymptomatic; clinical or diagnostic observations only; intervention not indicated<br>2: Symptomatic; altered eating/swallowing; oral supplements indicated<br>3: Severely altered eating/swallowing; tube feeding, TPN or hospitalization indicated<br>4: Life-threatening consequences; urgent operative intervention indicated<br>5: Death                  |
| Fecal incontinence              | CTCAEv4.03<br>Gastrointestinal disorders:<br>Fecal incontinence                                            | 1: Occasional use of pads required<br>2: Daily use of pads required<br>3: Severe symptoms; elective operative intervention indicated<br>4: Not applicable<br>5: Not applicable                                                                                                                                                                                    |
| Gastritis/duodenitis            | CTCAEv4.03<br>Gastrointestinal disorders:<br>Gastritis                                                     | 1: Asymptomatic; clinical or diagnostic observations only; intervention not indicated<br>2: Symptomatic; altered GI function; medical intervention indicated<br>3: Severely altered eating or gastric function; TPN or hospitalization indicated<br>4: Life-threatening consequences; urgent operative intervention indicated<br>5: Death                         |
| Gastroesophageal reflux disease | CTCAEv4.03<br>Gastrointestinal disorders:<br>Gastroesophageal reflux<br>disease                            | 1: Mild symptoms; intervention not indicated<br>2: Moderate symptoms; medical intervention indicated<br>3: Severe symptoms; surgical intervention indicated<br>4: Not applicable<br>5: Not applicable                                                                                                                                                             |
| Gastrointestinal fistulas       | CTCAEv4.03<br>Gastrointestinal disorders:<br>Gastrointestinal fistula                                      | 1: Asymptomatic; clinical or diagnostic observations only; intervention not indicated<br>2: Symptomatic; altered GI function<br>3: Severely altered GI function; tube feeding, TPN or hospitalization indicated; elective<br>operative intervention indicated<br>4: Life-threatening consequences; urgent operative intervention indicated<br>5: Death            |
| Gastrointestinal hemorrhage     | <b>Modified</b><br>CTCAEv4.03<br>Gastrointestinal disorders:<br>Upper/Lower gastrointestinal<br>hemorrhage | 1: Mild; intervention not indicated<br>2: Moderate symptoms; medical intervention or minor cauterization indicated<br>3: Transfusion; <b>invasive intervention indicated</b> (e.g. radiologic, endoscopic, or<br>elective operative interventions)<br>4: Life-threatening consequences; urgent intervention indicated<br>5: Death                                 |
| Gastrointestinal necrosis       | CTCAEv4.03<br>Gastrointestinal disorders:<br>Gastric necrosis                                              | 1: Not applicable<br>2: Not applicable<br>3: Inability to aliment adequately by GI tract; radiologic, endoscopic, or operative<br>intervention indicated<br>4: Life-threatening consequences; urgent operative intervention indicated<br>5: Death                                                                                                                 |
| Gastrointestinal obstruction    | CTCAEv4.03<br>Gastrointestinal disorders:<br>Small intestinal obstruction                                  | 1: Asymptomatic; clinical or diagnostic observations only; intervention not indicated<br>2: Symptomatic; altered GI function; limiting instrumental ADL<br>3: Hospitalization indicated; elective operative intervention indicated; limiting self -are<br>ADL; disabling<br>4: Life-threatening consequences; urgent operative intervention indicated<br>5: Death |

| Organ/System                | Grading Source                                                                | Grading Rubric                                                                                                                                                                                                                                                                                                                                                                                                                                                      |
|-----------------------------|-------------------------------------------------------------------------------|---------------------------------------------------------------------------------------------------------------------------------------------------------------------------------------------------------------------------------------------------------------------------------------------------------------------------------------------------------------------------------------------------------------------------------------------------------------------|
| Gastrointestinal strictures | CTCAEv4.03<br>Gastrointestinal disorders:<br>Esophageal stenosis              | 1: Asymptomatic; clinical or diagnostic observations only; intervention not indicated<br>2: Symptomatic; altered GI function<br>3: Severely altered GI function; tube feeding; hospitalization indicated; elective operative intervention indicated<br>4: Life-threatening consequences; urgent operative intervention indicated<br>5: Death                                                                                                                        |
| Gastrointestinal ulcer      | <b>Modified</b><br>CTCAEv4.03<br>Gastrointestinal disorders:<br>Gastric ulcer | 1: Asymptomatic; clinical or diagnostic observations only; intervention not indicated<br>2: Symptomatic; altered GI function; medical intervention indicated; limiting instrumental ADLs<br>3: Severely altered GI function; TPN indicated; <b>invasive intervention indicated</b> (e.g. elective operative or endoscopic intervention); limiting self-care ADL; disabling<br>4: Life-threatening consequences; urgent operative intervention indicated<br>5: Death |
| Gastroparesis syndrome      | CTCAEv4.03<br>Gastrointestinal disorders:<br>Gastroparesis                    | 1: Mild nausea, early satiety and bloating, able to maintain caloric intake on regular diet<br>2: Moderate symptoms; able to maintain nutrition with dietary and lifestyle modifications; may need pharmacologic intervention<br>3: Weight loss; refractory to medical intervention; unable to maintain nutrition orally<br>4: Not applicable<br>5: Not applicable                                                                                                  |
| Malabsorption syndrome      | CTCAEv4.03<br>Gastrointestinal disorders:<br>Malabsorption                    | 1: Not applicable<br>2: Altered diet; oral intervention Indicated<br>3: Inability to aliment adequately; TPN indicated<br>4: Life-threatening consequences; urgent intervention indicated<br>5: Death                                                                                                                                                                                                                                                               |
| Pancreatic insufficiency    | CTCAEv4.03<br>Investigations:<br>Pancreatic enzymes decreased                 | 1: <LLN and asymptomatic<br>2: Increase in stool frequency, bulk, or odor; steatorrhea<br>3: Sequelae of absorption deficiency<br>4: Not applicable<br>5: Not applicable                                                                                                                                                                                                                                                                                            |
| Pancreatitis                | CTCAEv4.03<br>Gastrointestinal disorders:<br>Pancreatitis                     | 1: Not applicable<br>2: Enzyme elevation or radiologic findings only<br>3: Severe pain; vomiting; medical intervention indicated (e.g., analgesia, nutritional support)<br>4: Life-threatening consequences; urgent intervention indicated<br>5: Death                                                                                                                                                                                                              |
| Proctitis                   | CTCAEv4.03<br>Gastrointestinal disorders:<br>Proctitis                        | 1: Rectal discomfort, intervention not indicated<br>2: Symptoms (e.g., rectal discomfort, passing blood or mucus); medical intervention indicated; limiting instrumental ADL<br>3: Severe symptoms; fecal urgency or stool incontinence; limiting self-care ADL<br>4: Life-threatening consequences; urgent intervention indicated<br>5: Death                                                                                                                      |

| Organ/System                                                                                     | Grading Source                                                                    | Grading Rubric                                                                                                                                                                                                                                                                                                                                                                                                                                                                              |
|--------------------------------------------------------------------------------------------------|-----------------------------------------------------------------------------------|---------------------------------------------------------------------------------------------------------------------------------------------------------------------------------------------------------------------------------------------------------------------------------------------------------------------------------------------------------------------------------------------------------------------------------------------------------------------------------------------|
| Sialoadenitis                                                                                    | CTCAEv4.03<br>Gastrointestinal disorders:<br>Salivary duct inflammation           | 1: Slightly thickened saliva; slightly altered taste (e.g., metallic)<br>2: Thick, ropy, sticky saliva; markedly altered taste; alteration in diet indicated; secretion-induced symptoms; limiting instrumental ADL<br>3: Acute salivary gland necrosis; severe secretion-induced symptoms (e.g., thick saliva/oral secretions or gagging); tube feeding or TPN indicated; limiting self-care ADL; disabling<br>4: Life-threatening consequences; urgent intervention indicated<br>5: Death |
| <b>Hepatobiliary</b>                                                                             |                                                                                   |                                                                                                                                                                                                                                                                                                                                                                                                                                                                                             |
| Cholecystitis<br>Cholelithiasis                                                                  | <b>Modified</b><br>CTCAEv4.03<br>Hepatobiliary disorders:<br>Cholecystitis        | 1: Not applicable<br>2: Symptomatic; medical intervention indicated<br>3: Severe symptoms; <b>invasive intervention indicated</b> (e.g radiologic, endoscopic or elective operative intervention)<br>4: Life-threatening consequences; urgent operative intervention indicated<br>5: Death                                                                                                                                                                                                  |
| Constipation                                                                                     | <b>Modified</b><br>CTCAEv4.03<br>Gastrointestinal disorders:<br>Constipation      | 1: <b>Not applicable</b><br>2: Persistent symptoms with regular use of laxatives or enemas; limiting instrumental ADL<br>3: Obstipation with manual evacuation indicated; limiting self-care ADL<br>4: Life-threatening consequences; urgent intervention indicated<br>5: Death                                                                                                                                                                                                             |
| Fibrosis/Cirrhosis<br><br>(Includes patients with Hepatitis B and Hepatitis C induced cirrhosis) | <b>New category and grading source</b><br><br>Multidisciplinary team consensus    | 1: <b>Not applicable</b><br>2: <b>Not applicable</b><br>3: <b>Compensated biopsy proven fibrosis/cirrhosis (e.g. asymptomatic varices or asymptomatic thrombocytopenia)</b><br>4: <b>Decompensated biopsy proven fibrosis/cirrhosis (e.g., coagulopathy, encephalopathy, coma, variceal hemorrhage)</b><br>5: <b>Death</b>                                                                                                                                                                  |
| Hepatic failure                                                                                  | <b>Modified</b><br>CTCAEv4.03<br>Gastrointestinal disorders:<br>Hepatic failure   | 1: Not applicable<br>2: Not applicable<br>3: Asterixis; mild encephalopathy; limiting self-care ADL<br>4: Moderate to severe encephalopathy; coma; life threatening consequences;<br><b>requiring liver transplantation</b><br>5: Death                                                                                                                                                                                                                                                     |
| Hepatopathy                                                                                      | CTCAEv4.03<br>Investigations:<br>Alanine and aspartate aminotransferase Increased | 1: >ULN - 3.0 x ULN<br>2: >3.0 - 5.0 x ULN<br>3: >5.0 - 20.0 x ULN<br>4: >20.0 x ULN<br>5: Not applicable                                                                                                                                                                                                                                                                                                                                                                                   |
| Portal hypertension                                                                              | CTCAEv4.03<br>Gastrointestinal disorders:<br>Portal hypertension                  | 1: Not applicable<br>2: Decreased portal vein flow<br>3: Reversal/retrograde portal vein flow; associated with varices and/or ascites<br>4: Life-threatening consequences; urgent intervention indicated<br>5: Death                                                                                                                                                                                                                                                                        |

| Organ/System                                                                                                                                                              | Grading Source                                                                                            | Grading Rubric                                                                                                                                                                                                                                                                                                                                                                                                                                                                                                                                             |
|---------------------------------------------------------------------------------------------------------------------------------------------------------------------------|-----------------------------------------------------------------------------------------------------------|------------------------------------------------------------------------------------------------------------------------------------------------------------------------------------------------------------------------------------------------------------------------------------------------------------------------------------------------------------------------------------------------------------------------------------------------------------------------------------------------------------------------------------------------------------|
| Veno-occlusive disease of liver (Sinusoidal obstructive syndrome)                                                                                                         | CTCAEv4.03<br>Hepatobiliary disorders:<br>Other, specify                                                  | 1: Asymptomatic or mild symptoms; clinical or diagnostic observations only; intervention not indicated<br>2: Moderate; minimal, local or noninvasive intervention indicated; limiting age appropriate instrumental ADL<br>3: Severe or medically significant but not immediately life threatening; hospitalization or prolongation of existing hospitalization indicated; disabling; limiting self-care ADL<br>4: Life-threatening consequences; urgent intervention indicated<br>5: Death                                                                 |
| <b>Hematologic</b>                                                                                                                                                        |                                                                                                           |                                                                                                                                                                                                                                                                                                                                                                                                                                                                                                                                                            |
| Anemia                                                                                                                                                                    | <b>Modified</b><br>CTCAEv4.03<br>Blood and lymphatic disorders:<br>Anemia                                 | 1: Hgb <LLN <b>by sex/age-appropriate standards</b> but >=10.0 g/dL<br>2: Hgb <10.0 - 8.0 g/dL<br>3: Hgb <8.0 g/dL; transfusion indicated<br>4: Life-threatening consequences; urgent intervention indicated<br>5: Death                                                                                                                                                                                                                                                                                                                                   |
| Coagulopathy<br>(Includes: disseminated intravascular coagulation, thrombotic thrombocytopenic purpura, hemolytic uremic syndrome, acquired von Willebrand disease, etc.) | <b>Modified</b><br>CTCAEv4.03<br>Blood and lymphatic disorders:<br>Disseminated intravascular Coagulation | 1: Not applicable<br>2: <b>Not applicable</b><br>3: Laboratory findings and bleeding<br>4: Life-threatening consequences; urgent intervention indicated<br>5: Death                                                                                                                                                                                                                                                                                                                                                                                        |
| Iron overload                                                                                                                                                             | <b>New category and grading source</b><br><br>Multidisciplinary team consensus                            | 1: <b>Tissue iron overload confirmed by imaging (e.g., T2*) or biopsy; intervention not indicated</b><br>2: <b>Tissue iron overload confirmed by imaging (e.g., T2*) or biopsy; phlebotomy or oral chelation therapy indicated or initiated</b><br>3: <b>Tissue iron overload confirmed by imaging (e.g., T2*) or biopsy; intravenous or subcutaneous chelation therapy indicated or initiated</b><br>4: <b>Life-threatening consequences; urgent intervention indicated or initiated; liver transplantation indicated or completed</b><br>5: <b>Death</b> |
| Neutropenia                                                                                                                                                               | <b>Modified</b><br>CTCAEv4.03<br>Investigations:<br>Neutrophil count decreased                            | 1: <b>&lt;1500 - 1000/mm<sup>3</sup></b><br>2: <b>&lt;1000 - 500/mm<sup>3</sup></b><br>3: <b>&lt;500/mm<sup>3</sup></b><br>4: <b>Not applicable</b><br>5: Not applicable                                                                                                                                                                                                                                                                                                                                                                                   |
| Polycythemia                                                                                                                                                              | <b>Modified</b><br>CTCAEv4.03<br>Investigations:<br>Hemoglobin increased                                  | 1: Increase in >0 - 2 g/dL above ULN or above baseline if baseline is above ULN<br>2: Increase in >2 - 4 g/dL above ULN or above baseline if baseline is above ULN; <b>requiring phlebotomy or other medical intervention.</b><br>3: Increase in >4 g/dL above ULN or above baseline if baseline is above ULN<br>4: <b>Not applicable</b><br>5: Not applicable                                                                                                                                                                                             |

| Organ/System                                                                                                                                                                          | Grading Source                                                              | Grading Rubric                                                                                                                                                                                                                                                                                                                                                                                                                                                                                                                                            |
|---------------------------------------------------------------------------------------------------------------------------------------------------------------------------------------|-----------------------------------------------------------------------------|-----------------------------------------------------------------------------------------------------------------------------------------------------------------------------------------------------------------------------------------------------------------------------------------------------------------------------------------------------------------------------------------------------------------------------------------------------------------------------------------------------------------------------------------------------------|
| Thrombocytopenia                                                                                                                                                                      | CTCAEv4.03<br>Investigations:<br>Platelet count decreased                   | 1: Platelets <LLN - 75,000/mm <sup>3</sup><br>2: <75,000 - 50,000/mm <sup>3</sup><br>3: <50,000 - 25,000/mm <sup>3</sup><br>4: <25,000/mm <sup>3</sup><br>5: Not applicable                                                                                                                                                                                                                                                                                                                                                                               |
| Thrombocytosis                                                                                                                                                                        | CTCAEv4.03<br>Blood and lymphatic disorders:<br>Other, specify              | 1: Asymptomatic or mild symptoms; clinical or diagnostic observations only; intervention not indicated<br>2: Moderate; minimal, local or non-invasive intervention indicated; limiting age appropriate instrumental ADL<br>3: Severe or medically significant but not immediately life threatening; hospitalization or prolongation of existing hospitalization indicated; disabling; limiting self-care ADL<br>4: Life-threatening consequences; urgent intervention indicated<br>5: Death                                                               |
| <b>Immunologic</b>                                                                                                                                                                    |                                                                             |                                                                                                                                                                                                                                                                                                                                                                                                                                                                                                                                                           |
| Autoimmune disorders<br>(Includes: sarcoidosis, collagen vascular diseases -- rheumatoid arthritis, systemic lupus erythematosus, scleroderma, dermatomyositis, polyarteritis nodosa) | CTCAEv4.03<br>Immune system disorders:<br>Autoimmune disorder               | 1: Asymptomatic; serologic or other evidence of autoimmune reaction, with normal organ function; intervention not indicated<br>2: Evidence of autoimmune reaction involving a nonessential organ or function (e.g., hypothyroidism)<br>3: Autoimmune reactions involving major organ (e.g., colitis, anemia, myocarditis, kidney)<br>4: Life-threatening consequences; urgent intervention indicated<br>5: Death                                                                                                                                          |
| Graft-versus-host disease                                                                                                                                                             | <b>Modified</b><br>CTCAEv4.03<br>Immune system disorders:<br>Other, specify | 1: Asymptomatic or mild symptoms; clinical or diagnostic observations only; intervention not indicated <b>or initiated</b><br>2: Moderate; minimal, local or non-invasive intervention indicated <b>or initiated</b> ; limiting age appropriate instrumental ADL<br>3: Severe or medically significant but not immediately life threatening; hospitalization or prolongation of existing hospitalization indicated; disabling; limiting self-care ADL<br>4: Life-threatening consequences; urgent intervention indicated<br>5: Death                      |
| Immunodeficiency<br>(Includes: hypogammaglobulinemia IgA deficiency, immunodeficiency NOT due to HIV or other infectious/neoplastic processes)                                        | <b>Modified</b><br>CTCAEv4.03<br>Immune system disorders:<br>Other, specify | 1: Asymptomatic or mild symptoms; clinical or diagnostic observations only; intervention not indicated <b>or initiated</b><br>2: Moderate; minimal, local or non-invasive intervention indicated ( <b>e.g. IVIG</b> ) <b>or initiated</b> ; limiting age appropriate instrumental ADL<br>3: Severe or medically significant but not immediately life threatening; hospitalization or prolongation of existing hospitalization indicated; disabling; limiting self-care ADL<br>4: Life-threatening consequences; urgent intervention indicated<br>5: Death |

| Organ/System                                                                                                                    | Grading Source                                                                             | Grading Rubric                                                                                                                                                                                                                                                                                                                                                                                          |
|---------------------------------------------------------------------------------------------------------------------------------|--------------------------------------------------------------------------------------------|---------------------------------------------------------------------------------------------------------------------------------------------------------------------------------------------------------------------------------------------------------------------------------------------------------------------------------------------------------------------------------------------------------|
| <b>Infectious</b><br>Bronchial/lung infections, chronic/recurrent<br><br>(defined as 3 infections in 6 months)                  | <b>Modified</b><br>CTCAEv4.03<br>Infections and infestations:<br>Lung infection            | 1: Not applicable<br>2: Moderate symptoms; oral intervention indicated <b>or initiated</b> (e.g., antibiotic, antifungal, antiviral)<br>3: IV antibiotic, antifungal, or antiviral intervention indicated <b>or initiated; invasive intervention indicated</b> (e.g., radiologic, endoscopic, or operative intervention)<br>4: Life-threatening consequences; urgent intervention indicated<br>5: Death |
| Endocarditis                                                                                                                    | <b>Modified</b><br>CTCAEv4.03<br>Infections and infestations:<br>Endocarditis infective    | 1: Not applicable<br>2: Not applicable<br>3: IV antibiotic, antifungal, or antiviral intervention indicated <b>or initiated; invasive intervention indicated</b> (e.g., radiologic or operative intervention)<br>3: Life-threatening consequences; urgent intervention indicated<br>4: Death                                                                                                            |
| Gastrointestinal infection<br><br>(Includes: appendicitis diverticulitis, typhlitis, esophagitis, gastritis, and enterocolitis) | <b>Modified</b><br>CTCAEv4.03<br>Infections and infestations:<br>Small intestine infection | 1: Not applicable<br>2: Moderate symptoms; oral intervention indicated <b>or initiated</b> (e.g., antibiotic, antifungal, antiviral)<br>3: IV antibiotic, antifungal, or antiviral intervention indicated <b>or initiated; invasive intervention indicated</b> (e.g., radiologic, endoscopic, or operative intervention)<br>4: Life-threatening consequences; urgent intervention indicated<br>5: Death |
| Genitourinary infection                                                                                                         | <b>Modified</b><br>CTCAEv4.03<br>Infections and infestations:<br>Urinary tract infection   | 1: Not applicable<br>2: Oral intervention indicated <b>or initiated</b> (e.g., oral or topical antibiotic, antifungal, antiviral)<br>3: IV antibiotic, antifungal, or antiviral intervention indicated <b>or initiated; invasive intervention indicated</b> (e.g., radiologic, endoscopic, or operative intervention)<br>4: Life-threatening consequences; urgent intervention indicated<br>5: Death    |
| Hepatitis B, chronic                                                                                                            | <b>Modified</b><br>CTCAEv4.03<br>Infections and infestations:<br>Hepatitis viral           | 1: <b>Asymptomatic</b><br>2: <b>Asymptomatic but treated with antiviral therapy</b><br>3: Symptomatic liver dysfunction; fibrosis by biopsy; compensated cirrhosis; hospitalization or prolongation of existing hospitalization indicated<br>4: Decompensated liver function (e.g., coagulopathy, encephalopathy, coma, <b>variceal hemorrhage</b> )<br>5: Death                                        |
| Hepatitis C, chronic                                                                                                            | <b>Modified</b><br>CTCAEv4.03<br>Infections and infestations:<br>Hepatitis viral           | 1: <b>Asymptomatic</b><br>2: <b>Asymptomatic but treated with antiviral therapy</b><br>3: Symptomatic liver dysfunction; fibrosis by biopsy; compensated cirrhosis; hospitalization or prolongation of existing hospitalization indicated<br>4: Decompensated liver function (e.g., coagulopathy, encephalopathy, coma, <b>variceal hemorrhage</b> )<br>5: Death                                        |

| Organ/System                                                          | Grading Source                                                                         | Grading Rubric                                                                                                                                                                                                                                                                                                                                                                                                                                                                                                                                                   |
|-----------------------------------------------------------------------|----------------------------------------------------------------------------------------|------------------------------------------------------------------------------------------------------------------------------------------------------------------------------------------------------------------------------------------------------------------------------------------------------------------------------------------------------------------------------------------------------------------------------------------------------------------------------------------------------------------------------------------------------------------|
| HIV infection                                                         | <b>Modified</b><br>CTCAEv4.03<br>Infections and infestations:<br>Other, specify        | 1: Asymptomatic or mild symptoms; clinical or diagnostic observations only<br>2: Moderate; minimal, local or noninvasive intervention indicated <b>or initiated (e.g., HAART therapy)</b> ; limiting age appropriate instrumental ADL<br>3: Severe or medically significant but not immediately life threatening, <b>including sequelae of opportunistic infection</b> ; hospitalization or prolongation of existing hospitalization indicated; disabling; limiting self-care ADL<br>4: Life-threatening consequences; urgent intervention indicated<br>5: Death |
| Lymphatic infection                                                   | <b>Modified</b><br>CTCAEv4.03<br>Infections and infestations:<br>Lymph gland infection | 1: Not applicable<br>2: Localized; local intervention indicated <b>or initiated</b> (e.g., topical antibiotic, antifungal, or antiviral)<br>3: IV antibiotic, antifungal, or antiviral intervention indicated <b>or initiated; invasive intervention indicated</b> (e.g., radiologic or operative intervention)<br>4: Life-threatening consequences; urgent intervention indicated<br>5: Death                                                                                                                                                                   |
| Meningoencephalitis                                                   | <b>Modified</b><br>CTCAEv4.03<br>Infections and infestations:<br>Meningitis            | 1: Not applicable<br>2: Not applicable<br>3: IV antibiotic, antifungal, or antiviral intervention indicated <b>or initiated; invasive intervention indicated</b> (e.g., radiologic or operative intervention); focal neurologic deficit<br>4: Life-threatening consequences; urgent intervention indicated<br>5: Death                                                                                                                                                                                                                                           |
| Osteomyelitis                                                         | <b>Modified</b><br>CTCAEv4.03<br>Infections and infestations:<br>Bone infection        | 1: Not applicable<br>2: Not applicable<br>3: IV antibiotic, antifungal, or antiviral intervention indicated <b>or initiated; invasive intervention indicated</b> (e.g., radiologic or operative intervention)<br>4: Life-threatening consequences; urgent intervention indicated<br>5: Death                                                                                                                                                                                                                                                                     |
| Otitis media, chronic/recurrent (defined as 3 infections in 6 months) | <b>Modified</b><br>CTCAEv4.03<br>Infections and infestations:<br>Otitis media          | 1: Not applicable<br>2: Localized; local intervention indicated <b>or initiated</b> (e.g., topical antibiotic, antifungal, or antiviral)<br>3: IV antibiotic, antifungal, or antiviral intervention indicated <b>or initiated; invasive intervention indicated</b> (e.g., radiologic or operative intervention)<br>4: Life-threatening consequences; urgent intervention indicated<br>5: Death                                                                                                                                                                   |
| Pelvic inflammatory disease                                           | <b>Modified</b><br>CTCAEv4.03<br>Infections and infestations:<br>Pelvic infection      | 1: Not applicable<br>2: Moderate symptoms; oral intervention indicated <b>or initiated</b> (e.g., antibiotic, antifungal, antiviral)<br>3: IV antibiotic, antifungal, or antiviral intervention indicated <b>or initiated; invasive intervention indicated</b> (e.g., radiologic or operative intervention)<br>4: Life-threatening consequences; urgent intervention indicated<br>5: Death                                                                                                                                                                       |

| Organ/System                                                                     | Grading Source                                                                                                                                                                                                                                                                                                                                 | Grading Rubric                                                                                                                                                                                                                                                                                                                                                                                              |
|----------------------------------------------------------------------------------|------------------------------------------------------------------------------------------------------------------------------------------------------------------------------------------------------------------------------------------------------------------------------------------------------------------------------------------------|-------------------------------------------------------------------------------------------------------------------------------------------------------------------------------------------------------------------------------------------------------------------------------------------------------------------------------------------------------------------------------------------------------------|
| Pharyngitis/tonsillitis, chronic/recurrent (defined as 3 infections in 6 months) | <b>Modified</b><br>CTCAEv4.03<br>Infections and infestations:<br>Pharyngitis                                                                                                                                                                                                                                                                   | 1: Not applicable<br>2: Localized; local intervention indicated <b>or initiated</b> (e.g., topical antibiotic, antifungal, or antiviral)<br>3: IV antibiotic, antifungal, or antiviral intervention indicated <b>or initiated; invasive intervention indicated</b> (e.g., radiologic, endoscopic, or operative intervention)<br>4: Life-threatening consequences; urgent intervention indicated<br>5: Death |
| Sinusitis, chronic/recurrent (defined as 3 infections in 6 months)               | <b>Modified</b><br>CTCAEv4.03<br>Infections and infestations:<br>Sinusitis                                                                                                                                                                                                                                                                     | 1: Not applicable<br>2: Localized; local intervention indicated <b>or initiated</b> (e.g., topical antibiotic, antifungal, or antiviral)<br>3: IV antibiotic, antifungal, or antiviral intervention indicated <b>or initiated; invasive intervention indicated</b> (e.g., radiologic, endoscopic, or operative intervention)<br>4: Life-threatening consequences; urgent intervention indicated<br>5: Death |
| Soft tissue infection                                                            | <b>Modified</b><br>CTCAEv4.03<br>Infections and infestations:<br>Soft tissue infection                                                                                                                                                                                                                                                         | 1: Not applicable<br>2: <b>Moderate symptoms</b> ; oral intervention indicated <b>or initiated</b> (e.g., antibiotic, antifungal, antiviral)<br>3: IV antibiotic, antifungal, or antiviral intervention indicated <b>or initiated; invasive intervention indicated</b> (e.g., radiologic or operative intervention)<br>4: Life-threatening consequences; urgent intervention indicated<br>5: Death          |
| <b>Musculoskeletal</b>                                                           |                                                                                                                                                                                                                                                                                                                                                |                                                                                                                                                                                                                                                                                                                                                                                                             |
| Amputation                                                                       | <b>New category and grading source</b><br><br>ICD-9-CM Diagnosis and Procedure Codes: Abbreviated and Full Code Titles. Centers for Medicare & Medicaid Services<br>< <a href="https://www.cms.gov/medicare/coding/ICD9providerdiagnosticcodes/codes.html#">https://www.cms.gov/medicare/coding/ICD9providerdiagnosticcodes/codes.html#</a> >. | <b>1: Partial ostectomy or other bone repair</b><br><b>2: Amputation below ankle or below elbow; revision of amputation</b><br><b>3: Total ostectomy; upper extremity amputation above elbow or higher; lower extremity amputation above ankle or higher</b><br><b>4: Not applicable</b><br><b>5: Not applicable</b>                                                                                        |
| Arthralgia                                                                       | CTCAEv4.03<br>Musculoskeletal & connective tissue disorders:<br>Arthralgia                                                                                                                                                                                                                                                                     | 1: Mild pain<br>2: Moderate pain; limiting instrumental ADL<br>3: Severe pain; limiting self-care ADL<br>4: Not applicable<br>5: Not applicable                                                                                                                                                                                                                                                             |
| Arthritis                                                                        | CTCAEv4.03<br>Musculoskeletal & connective tissue disorders:<br>Arthritis                                                                                                                                                                                                                                                                      | 1: Mild pain with inflammation, erythema, or joint swelling<br>2: Moderate pain associated with signs of inflammation, erythema, or joint swelling; limiting instrumental ADL<br>3: Severe pain associated with signs of inflammation, erythema, or joint swelling; irreversible joint damage; disabling; limiting self-care ADL<br>4: Not applicable<br>5: Not applicable                                  |



| Organ/System                                                                                                                             | Grading Source                                                                                                                                                                                                             | Grading Rubric                                                                                                                                                                                                                                                                                                                                                                                                                                                                                                     |                                                                                                                                                                                                                                                                                                                                                                                                                                                                                                                |
|------------------------------------------------------------------------------------------------------------------------------------------|----------------------------------------------------------------------------------------------------------------------------------------------------------------------------------------------------------------------------|--------------------------------------------------------------------------------------------------------------------------------------------------------------------------------------------------------------------------------------------------------------------------------------------------------------------------------------------------------------------------------------------------------------------------------------------------------------------------------------------------------------------|----------------------------------------------------------------------------------------------------------------------------------------------------------------------------------------------------------------------------------------------------------------------------------------------------------------------------------------------------------------------------------------------------------------------------------------------------------------------------------------------------------------|
| Bone mineral density deficit                                                                                                             | <p><b>Modified</b><br/>CTCAEv4.03<br/>Musculoskeletal &amp; connective tissue disorders:<br/>Osteoporosis</p> <p>-and-</p> <p><b>New grading source (Pediatric)</b><br/>International Society of Clinical Densitometry</p> | <p>Adults</p> <p>1: Radiologic evidence of osteoporosis or Bone Mineral Density (BMD) t-score -1 to -2.5 (osteopenia); no loss of height or intervention indicated;</p> <p>2: BMD t-score &lt;-2.5; loss of height &lt;2 cm; anti-osteoporotic therapy indicated <b>or initiated</b>; therapy to improve BMD indicated <b>or initiated</b>; limiting instrumental ADL;</p> <p>3: Loss of height &gt;=2 cm; hospitalization indicated; limiting self-care ADL</p> <p>4: Not applicable</p> <p>5: Not applicable</p> | <p><b>Pediatric</b></p> <p><b>1: Radiologic evidence of low BMD with z score of ≤-2.0 and no history of significant fractures</b></p> <p><b>2: Low BMD ( z-score ≤-2.0) and significant fracture history (defined as a long bone fracture of the lower extremity, vertebral compression, 2 or more long bone fracture of the upper extremities); therapy to improve BMD indicated or initiated</b></p> <p><b>3: Limiting self-care ADL</b></p> <p><b>4: Not applicable</b></p> <p><b>5: Not applicable</b></p> |
| Dental maldevelopment<br><br>(Includes: adontia, hypodontia, microdontia, root stunting, enamel demineralization/ decalcification, etc.) | CTCAEv4.03<br>Gastrointestinal disorders:<br>Tooth development disorder                                                                                                                                                    | <p>1: Asymptomatic; hypoplasia of tooth or enamel</p> <p>2: Impairment correctable with oral surgery</p> <p>3: Maldevelopment with impairment not surgically correctable; disabling</p> <p>4: Not applicable</p> <p>5: Not applicable</p>                                                                                                                                                                                                                                                                          |                                                                                                                                                                                                                                                                                                                                                                                                                                                                                                                |
| Hernia<br><br>(Includes: abdominal, umbilical, ventral, inguinal, femoral, etc.)                                                         | CTCAEv4.03<br>Musculoskeletal & connective tissue disorders:<br>Other, specify                                                                                                                                             | <p>1: Asymptomatic or mild symptoms; clinical or diagnostic observations only; intervention not indicated</p> <p>2: Moderate; minimal, local or non-invasive intervention indicated; limiting age appropriate instrumental ADL</p> <p>3: Severe or medically significant but not immediately life threatening; hospitalization or prolongation of existing hospitalization indicated; disabling; limiting self-care ADL</p> <p>4: Life-threatening consequences; urgent intervention indicated</p> <p>5: Death</p> |                                                                                                                                                                                                                                                                                                                                                                                                                                                                                                                |
| Intervertebral disc disorder<br><br>(Includes: disc degeneration, disc herniation)                                                       | CTCAEv4.03<br>Musculoskeletal & connective tissue disorders:<br>Other, specify                                                                                                                                             | <p>1: Asymptomatic or mild symptoms; clinical or diagnostic observations only; intervention not indicated</p> <p>2: Moderate; minimal, local or non-invasive intervention indicated; limiting age appropriate instrumental ADL</p> <p>3: Severe or medically significant but not immediately life threatening; hospitalization or prolongation of existing hospitalization indicated; disabling; limiting self-care ADL</p> <p>4: Life-threatening consequences; urgent intervention indicated</p> <p>5: Death</p> |                                                                                                                                                                                                                                                                                                                                                                                                                                                                                                                |
| Kyphosis                                                                                                                                 | <p><b>Modified</b><br/>CTCAEv4.03<br/>Musculoskeletal &amp; connective tissue disorders:<br/>Kyphosis</p>                                                                                                                  | <p>1: <b>Not applicable</b></p> <p>2: Moderate accentuation; limiting instrumental ADL</p> <p>3: Severe accentuation; operative intervention indicated; limiting self-care ADL</p> <p>4: Not applicable</p> <p>5: Not applicable</p>                                                                                                                                                                                                                                                                               |                                                                                                                                                                                                                                                                                                                                                                                                                                                                                                                |

| Organ/System                                                                                        | Grading Source                                                                                         | Grading Rubric                                                                                                                                                                                                                                                                                                                                                                                                                                                                              |
|-----------------------------------------------------------------------------------------------------|--------------------------------------------------------------------------------------------------------|---------------------------------------------------------------------------------------------------------------------------------------------------------------------------------------------------------------------------------------------------------------------------------------------------------------------------------------------------------------------------------------------------------------------------------------------------------------------------------------------|
| Limb length discrepancy                                                                             | <b>Modified</b><br>CTCAEv4.03<br>Musculoskeletal & connective tissue disorders:<br>Unequal limb length | 1: <b>Not applicable</b><br>2: Moderate length discrepancy 2-5 cm; shoe lift indicated; limiting instrumental ADL<br>3: Severe length discrepancy >5 cm; limiting self-care ADL; disabling; operative intervention indicated<br>4: Not applicable<br>5: Not applicable                                                                                                                                                                                                                      |
| Osteonecrosis                                                                                       | <b>Modified</b><br>CTCAEv4.03<br>Musculoskeletal & connective tissue disorders:<br>Avascular necrosis  | 1: Asymptomatic; clinical or diagnostic observations only; intervention not indicated<br>2: Symptomatic; medical intervention indicated ( <b>e.g., analgesics, anti-inflammatory</b> ); limiting instrumental ADL<br>3: Severe symptoms; limiting self-care ADL; elective operative intervention indicated<br>4: Life-threatening consequences; urgent intervention indicated<br>5: Death                                                                                                   |
| Palatal defects, acquired                                                                           | CTCAEv4.03<br>Musculoskeletal & connective tissue disorders:<br>Other, specify                         | 1: Asymptomatic or mild symptoms; clinical or diagnostic observations only; intervention not indicated<br>2: Moderate; minimal, local or noninvasive intervention indicated; limiting age appropriate instrumental ADL<br>3: Severe or medically significant but not immediately life threatening; hospitalization or prolongation of existing hospitalization indicated; disabling; limiting self-care ADL<br>4: Life-threatening consequences; urgent intervention indicated<br>5: Death  |
| Prosthetic malfunction<br>(Includes: dislodgement, fracture, loosening)                             | CTCAEv4.03<br>Musculoskeletal & connective tissue disorders:<br>Other, specify                         | 1: Asymptomatic or mild symptoms; clinical or diagnostic observations only; intervention not indicated<br>2: Moderate; minimal, local or noninvasive intervention indicated; limiting age appropriate instrumental ADL<br>3: Severe or medically significant but not immediately life threatening; hospitalization or prolongation of existing hospitalization indicated; disabling; limiting self-care ADL<br>4: Life-threatening consequences; urgent intervention indicated<br>5: Death  |
| Scoliosis                                                                                           | <b>Modified</b><br>CTCAEv4.03<br>Musculoskeletal & connective tissue disorders:<br>Scoliosis           | 1: <b>&gt; 8 and &lt;15 degrees</b> ; clinically undetectable<br>2: <b>&gt;=15 - 30 degrees</b> ; visible by forward flexion; limiting instrumental ADL<br>3: <b>&gt;=30 degrees</b> ; scapular prominence in forward flexion; operative intervention indicated; limiting self-care ADL; disabling<br>4: Not applicable<br>5: Not applicable                                                                                                                                                |
| Skeletal spine disorder<br>(Includes: spondylitis, spondylolisthesis, spondylomalacia, spondylosis) | CTCAEv4.03<br>Musculoskeletal & connective tissue disorders:<br>Other, specify                         | 1: Asymptomatic or mild symptoms; clinical or diagnostic observations only; intervention not indicated<br>2: Moderate; minimal, local or non-invasive intervention indicated; limiting age appropriate instrumental ADL<br>3: Severe or medically significant but not immediately life threatening; hospitalization or prolongation of existing hospitalization indicated; disabling; limiting self-care ADL<br>4: Life-threatening consequences; urgent intervention indicated<br>5: Death |

| Organ/System                                                                                                                                 | Grading Source                                                                 | Grading Rubric                                                                                                                                                                                                                                                                                                                                                                                                                                                                              |
|----------------------------------------------------------------------------------------------------------------------------------------------|--------------------------------------------------------------------------------|---------------------------------------------------------------------------------------------------------------------------------------------------------------------------------------------------------------------------------------------------------------------------------------------------------------------------------------------------------------------------------------------------------------------------------------------------------------------------------------------|
| Slipped capital femoral epiphysis                                                                                                            | CTCAEv4.03<br>Musculoskeletal & connective tissue disorders:<br>Other, specify | 1: Asymptomatic or mild symptoms; clinical or diagnostic observations only; intervention not indicated<br>2: Moderate; minimal, local or non-invasive intervention indicated; limiting age appropriate instrumental ADL<br>3: Severe or medically significant but not immediately life threatening; hospitalization or prolongation of existing hospitalization indicated; disabling; limiting self-care ADL<br>4: Life-threatening consequences; urgent intervention indicated<br>5: Death |
| Temporomandibular joint disorder                                                                                                             | CTCAEv4.03<br>Musculoskeletal & connective tissue disorders:<br>Other, specify | 1: Asymptomatic or mild symptoms; clinical or diagnostic observations only; intervention not indicated<br>2: Moderate; minimal, local or non-invasive intervention indicated; limiting age appropriate instrumental ADL<br>3: Severe or medically significant but not immediately life threatening; hospitalization or prolongation of existing hospitalization indicated; disabling; limiting self-care ADL<br>4: Life-threatening consequences; urgent intervention indicated<br>5: Death |
| <b>Neurologic</b>                                                                                                                            |                                                                                |                                                                                                                                                                                                                                                                                                                                                                                                                                                                                             |
| Autonomic dysfunction<br><br>(Includes Horner's syndrome)                                                                                    | CTCAEv4.03<br>Nervous system disorders:<br>Other, specify                      | 1: Asymptomatic or mild symptoms; clinical or diagnostic observations only; intervention not indicated<br>2: Moderate; minimal, local or noninvasive intervention indicated; limiting age appropriate instrumental ADL<br>3: Severe or medically significant but not immediately life threatening; hospitalization or prolongation of existing hospitalization indicated; disabling; limiting self-care ADL<br>4: Life-threatening consequences; urgent intervention indicated<br>5: Death  |
| Cavernoma                                                                                                                                    | CTCAEv4.03<br>Nervous system disorders:<br>Other, specify                      | 1: Asymptomatic or mild symptoms; clinical or diagnostic observations only; intervention not indicated<br>2: Moderate; minimal, local or noninvasive intervention indicated; limiting age appropriate instrumental ADL<br>3: Severe or medically significant but not immediately life threatening; hospitalization or prolongation of existing hospitalization indicated; disabling; limiting self-care ADL<br>4: Life-threatening consequences; urgent intervention indicated<br>5: Death  |
| Cerebellar dysfunction<br><br>(Includes: demyelization, drug-induced, hereditary, nutritional, surgical, trauma, tumors, or vascular causes) | CTCAEv4.03<br>Nervous system disorders:<br>Ataxia                              | 1: Asymptomatic; clinical or diagnostic observations only; intervention not indicated<br>2: Moderate symptoms; limiting instrumental ADL<br>3: Severe symptoms; limiting self-care ADL; mechanical assistance indicated<br>4: Not applicable<br>5: Not applicable                                                                                                                                                                                                                           |
| Cerebral necrosis                                                                                                                            | CTCAEv4.03<br>Nervous system disorders:<br>Central nervous system necrosis     | 1: Asymptomatic; clinical or diagnostic observations only; intervention not indicated<br>2: Moderate symptoms; corticosteroids indicated<br>3: Severe symptoms; medical intervention indicated (e.g., HBO)<br>4: Life-threatening consequences; urgent/surgical intervention indicated<br>5: Death                                                                                                                                                                                          |

| Organ/System                                                                                                                                                                                                      | Grading Source                                                                                                         | Grading Rubric                                                                                                                                                                                                                                                                                                                                                                                                                                                                             |
|-------------------------------------------------------------------------------------------------------------------------------------------------------------------------------------------------------------------|------------------------------------------------------------------------------------------------------------------------|--------------------------------------------------------------------------------------------------------------------------------------------------------------------------------------------------------------------------------------------------------------------------------------------------------------------------------------------------------------------------------------------------------------------------------------------------------------------------------------------|
| Cerebrovascular accident<br><br>(Includes: lacunes, hemorrhagic stroke, Ischemic stroke)                                                                                                                          | CTCAEv4.03<br>Nervous system disorders:<br>Stroke                                                                      | 1: Asymptomatic or mild neurologic deficit; radiographic findings only<br>2: Moderate neurologic deficit<br>3: Severe neurologic deficit<br>4: Life-threatening consequences; urgent intervention indicated<br>5: Death                                                                                                                                                                                                                                                                    |
| Cerebrovascular disease<br><br>(Includes: stenotic or occlusive large vessel disease, moyamoya)                                                                                                                   | CTCAEv4.03<br>Nervous system disorders:<br>Other, specify                                                              | 1: Asymptomatic or mild symptoms; clinical or diagnostic observations only; intervention not indicated<br>2: Moderate; minimal, local or noninvasive intervention indicated; limiting age appropriate instrumental ADL<br>3: Severe or medically significant but not immediately life threatening; hospitalization or prolongation of existing hospitalization indicated; disabling; limiting self-care ADL<br>4: Life-threatening consequences; urgent intervention indicated<br>5: Death |
| Cranial nerve disorder                                                                                                                                                                                            | <b>Modified</b><br>CTCAEv4.03<br>Nervous system disorders:<br>Trigeminal, oculomotor, etc...<br>cranial nerve disorder | 1: Asymptomatic; clinical or diagnostic observations only; intervention not indicated<br>2: Moderate symptoms; limiting instrumental ADL<br>3: Severe symptoms; limiting self-care ADL ( <b>e.g., surgical intervention indicated</b> )<br>4: Not applicable<br>5: Not applicable                                                                                                                                                                                                          |
| Dysarthria                                                                                                                                                                                                        | <b>Modified</b><br>CTCAEv4.03<br>Nervous system disorders:<br>Dysarthria                                               | 1: Mild slurred speech ( <b>easily understood</b> )<br>2: Moderate impairment of articulation or slurred speech ( <b>some need for repetition to be understood</b> )<br>3: Severe impairment of articulation or slurred speech ( <b>unintelligible speech</b> )<br>4: Not applicable<br>5: Not applicable                                                                                                                                                                                  |
| Headaches, chronic/ recurrent<br>(Includes: migraines)<br>Chronic headaches defined as headaches 15 days in a month for 3 consecutive months<br>Recurrent headaches defined as at least 5 headaches over lifetime | <b>Modified</b><br>CTCAEv4.03<br>Nervous system disorders:<br>Headaches                                                | 1: Mild pain<br>2: Moderate pain <b>requiring prescriptive abortive medication</b> ; limiting instrumental ADL<br>3: Severe pain <b>requiring prophylactic medication</b> ; limiting self-care ADL<br>4: Not applicable<br>5: Not applicable                                                                                                                                                                                                                                               |
| Hydrocephalus                                                                                                                                                                                                     | CTCAEv4.03<br>Nervous system disorders:<br>Hydrocephalus                                                               | 1: Asymptomatic; clinical or diagnostic observations only; intervention not indicated<br>2: Moderate symptoms; intervention not indicated<br>3: Severe symptoms or neurological deficit; intervention indicated<br>4: Life-threatening consequences; urgent intervention indicated<br>5: Death                                                                                                                                                                                             |
| Hydrosyringomyelia<br><br>(Includes: syrinx, syringohydromyelia, syringomyelia)                                                                                                                                   | CTCAEv4.03<br>Nervous system disorders:<br>Other, specify                                                              | 1: Asymptomatic or mild symptoms; clinical or diagnostic observations only; intervention not indicated<br>2: Moderate; minimal, local or noninvasive intervention indicated; limiting age appropriate instrumental ADL<br>3: Severe or medically significant but not immediately life threatening; hospitalization or prolongation of existing hospitalization indicated; disabling; limiting self-care ADL<br>4: Life-threatening consequences; urgent intervention indicated<br>5: Death |

| Organ/System                                                                                                                                                   | Grading Source                                                                        | Grading Rubric                                                                                                                                                                                                                                                                                                                                                                                                                                                                                                                                                                                             |
|----------------------------------------------------------------------------------------------------------------------------------------------------------------|---------------------------------------------------------------------------------------|------------------------------------------------------------------------------------------------------------------------------------------------------------------------------------------------------------------------------------------------------------------------------------------------------------------------------------------------------------------------------------------------------------------------------------------------------------------------------------------------------------------------------------------------------------------------------------------------------------|
| Intracranial hemorrhage<br>(Includes: subdural, subarachnoid, intraventricular)                                                                                | <b>Modified</b><br>CTCAEv4.03<br>Nervous system disorders:<br>Intracranial hemorrhage | 1: Asymptomatic; clinical or diagnostic observations only; intervention not indicated<br><b>(MRI evidence of microhemorrhage, e.g. hemosiderin)</b><br>2: Moderate symptoms; medical intervention indicated<br>3: Ventriculostomy, ICP monitoring, intraventricular thrombolysis, or operative intervention indicated<br>4: Life-threatening consequences; urgent intervention indicated<br>5: Death                                                                                                                                                                                                       |
| Movement disorders<br>(Includes: athetosis, ballism, chorea, dystonia, myoclonus, opsoclonus/ myoclonus, Parkinsonism, restless legs, tic tremor, torticollis) | <b>Modified</b><br>CTCAEv4.03<br>Nervous system disorders:<br>Movements involuntary   | 1: Mild <b>involuntary movements</b><br>2: Moderate <b>involuntary movements</b> ; limiting instrumental ADL<br>3: Severe <b>involuntary movements</b> ; limiting self-care ADL<br>4: Not applicable<br>5: Not applicable                                                                                                                                                                                                                                                                                                                                                                                  |
| Multiple sclerosis                                                                                                                                             | CTCAEv4.03<br>Nervous system disorders:<br>Other, specify                             | 1: Asymptomatic or mild symptoms; clinical or diagnostic observations only; intervention not indicated<br>2: Moderate; minimal, local or noninvasive intervention indicated; limiting age appropriate instrumental ADL<br>3: Severe or medically significant but not immediately life threatening; hospitalization or prolongation of existing hospitalization indicated; disabling; limiting self-care ADL<br>4: Life-threatening consequences; urgent intervention indicated<br>5: Death                                                                                                                 |
| Narcolepsy                                                                                                                                                     | <b>Modified</b><br>CTCAEv4.03<br>Nervous system disorders:<br>Hypersomnia             | <b>1: Not applicable</b><br><b>2: Documentation of narcolepsy without need for therapy</b> ; moderate increased need for sleep<br><b>3: Documentation of narcolepsy with need for therapy</b> ; severe increased need for sleep<br>4: Not applicable<br>5: Not applicable                                                                                                                                                                                                                                                                                                                                  |
| Nerve root disorder<br>(Includes: radiculopathy, plexopathy, cauda equina syndrome)                                                                            | CTCAEv4.03<br>Nervous system disorders:<br>Radiculitis                                | 1: Mild symptoms<br>2: Moderate symptoms; limiting instrumental ADL; medical intervention indicated<br>3: Severe symptoms; limiting self-care ADL<br>4: Life-threatening consequences; urgent intervention indicated<br>5: Death                                                                                                                                                                                                                                                                                                                                                                           |
| Neurogenic bladder                                                                                                                                             | <b>Modified</b><br>CTCAEv4.03<br>Nervous system disorders:<br>Other, specify          | 1: Asymptomatic or mild symptoms; clinical or diagnostic observations only; intervention not indicated<br>2: Moderate; minimal, local or noninvasive intervention indicated ( <b>medical management e.g., oxybutynin</b> ); limiting age appropriate instrumental ADL<br>3: Severe or medically significant but not immediately life threatening; hospitalization or prolongation of existing hospitalization indicated; <b>surgical intervention indicated (e.g. ileal-anal pouch)</b> ; disabling; limiting self-care ADL<br>4: Life-threatening consequences; urgent intervention indicated<br>5: Death |

| Organ/System                                                                                                                                                                       | Grading Source                                                               | Grading Rubric                                                                                                                                                                                                                                                                                                                                                                                                                                                                                                                                                                 |
|------------------------------------------------------------------------------------------------------------------------------------------------------------------------------------|------------------------------------------------------------------------------|--------------------------------------------------------------------------------------------------------------------------------------------------------------------------------------------------------------------------------------------------------------------------------------------------------------------------------------------------------------------------------------------------------------------------------------------------------------------------------------------------------------------------------------------------------------------------------|
| Neurogenic bowel                                                                                                                                                                   | <b>Modified</b><br>CTCAEv4.03<br>Nervous system disorders:<br>Other, specify | 1: Asymptomatic or mild symptoms; clinical or diagnostic observations only; intervention not indicated<br>2: Moderate; minimal, local or noninvasive intervention indicated ( <b>e.g. stool softener</b> ); limiting age appropriate instrumental ADL<br>3: Severe or medically significant but not immediately life threatening; hospitalization or prolongation of existing hospitalization indicated; <b>surgical intervention indicated (e.g. MACE)</b> ; disabling; limiting self-care ADL<br>4: Life-threatening consequences; urgent intervention indicated<br>5: Death |
| Neuromuscular disorders<br><br>(Includes: dermatomyositis, myotonia, neuromuscular disorder, polymyositis, rhabdomyolysis, steroid myopathy, critical illness myopathy/neuropathy) | CTCAEv4.03<br>Nervous system disorders:<br>Other, specify                    | 1: Asymptomatic or mild symptoms; clinical or diagnostic observations only; intervention not indicated<br>2: Moderate; minimal, local or noninvasive intervention indicated; limiting age appropriate instrumental ADL<br>3: Severe or medically significant but not immediately life-threatening; hospitalization or prolongation of existing hospitalization indicated; disabling; limiting self-care ADL<br>4: Life-threatening consequences; urgent intervention indicated<br>5: Death                                                                                     |
| Paralytic disorder<br><br>(Includes: hemiparesis/ plegia, quadriplegia/ plegia, paraparesis/ plegia, flaccid paralysis, spastic paralysis)                                         | <b>Modified</b><br>CTCAEv4.03<br>Nervous system disorders:<br>Other, specify | 1: Asymptomatic or mild symptoms ( <b>e.g., facial paraparesis</b> ); clinical or diagnostic observations only; intervention not indicated<br>2: Moderate ( <b>e.g., paraparesis</b> ); minimal, local or noninvasive intervention indicated; limiting age appropriate instrumental ADL<br>3: Severe weakness or sensory loss ( <b>e.g., paraplegia requiring wheelchair</b> ); limiting self-care ADL<br>4: Life-threatening consequences ( <b>e.g., quadriplegia</b> ); urgent intervention indicated<br>5: Death                                                            |
| Peripheral motor neuropathy<br><br>(Includes: inflammatory demyelinating polyneuropathy disorder - Guillain-Barre syndrome)                                                        | CTCAEv4.03<br>Nervous system disorders:<br>Peripheral motor neuropathy       | 1: Asymptomatic; clinical or diagnostic observations only; intervention not indicated<br>2: Moderate symptoms; limiting instrumental ADL<br>3: Severe symptoms; limiting self-care ADL; assistive device indicated<br>4: Life-threatening consequences; urgent intervention indicated<br>5: Death                                                                                                                                                                                                                                                                              |
| Peripheral sensory neuropathy                                                                                                                                                      | CTCAEv4.03<br>Nervous system disorders:<br>Peripheral sensory neuropathy     | 1: Asymptomatic; loss of deep tendon reflexes or paresthesia<br>2: Moderate symptoms; limiting instrumental ADL<br>3: Severe symptoms; limiting self-care ADL<br>4: Life-threatening consequences; urgent intervention indicated<br>5: Death                                                                                                                                                                                                                                                                                                                                   |
| Pseudomeningocele                                                                                                                                                                  | CTCAEv4.03<br>Nervous system disorders:<br>Other, specify                    | 1: Asymptomatic or mild symptoms; clinical or diagnostic observations only; intervention not indicated<br>2: Moderate; minimal, local or noninvasive intervention indicated; limiting age appropriate instrumental ADL<br>3: Severe or medically significant but not immediately life threatening; hospitalization or prolongation of existing hospitalization indicated; disabling; limiting self-care ADL<br>4: Life-threatening consequences; urgent intervention indicated<br>5: Death                                                                                     |

| Organ/System                                                                                                                                                        | Grading Source                                                               | Grading Rubric                                                                                                                                                                                                                                                                                                                                                                                                                                                                                                                                                                                                                                                                                                    |
|---------------------------------------------------------------------------------------------------------------------------------------------------------------------|------------------------------------------------------------------------------|-------------------------------------------------------------------------------------------------------------------------------------------------------------------------------------------------------------------------------------------------------------------------------------------------------------------------------------------------------------------------------------------------------------------------------------------------------------------------------------------------------------------------------------------------------------------------------------------------------------------------------------------------------------------------------------------------------------------|
| Pseudotumor cerebri                                                                                                                                                 | <b>Modified</b><br>CTCAEv4.03<br>Nervous system disorders:<br>Other, specify | 1: Asymptomatic or mild symptoms; clinical <b>management</b> or diagnostic observations only ( <b>e.g., weight control</b> )<br>2: Moderate; minimal, local or noninvasive intervention indicated; limiting age appropriate instrumental ADL; <b>medical intervention indicated or initiated (e.g., acetazolamide)</b><br>3: Severe or medically significant but not immediately life threatening; hospitalization or prolongation of existing hospitalization indicated; disabling; limiting self-care ADL; <b>surgical intervention indicated or initiated (e.g., lumbar puncture)</b><br>4: Life-threatening consequences; urgent intervention indicated ( <b>e.g., severe visual impairment</b> )<br>5: Death |
| Seizures                                                                                                                                                            | <b>New grading source</b><br>Multidisciplinary team consensus                | <b>1: Seizures not requiring medication</b><br><b>2: Seizures requiring one non-prn medication</b><br><b>3: Seizures requiring two or more non-prn medications; poorly controlled seizures with prescribed medications</b><br><b>4: Seizures requiring evaluation for surgical intervention</b><br><b>5: Death</b>                                                                                                                                                                                                                                                                                                                                                                                                |
| Shunt malfunction                                                                                                                                                   | CTCAEv4.03<br>Nervous system disorders:<br>Hydrocephalus                     | 1: Asymptomatic; clinical or diagnostic observations only; intervention not indicated<br>2: Moderate symptoms; intervention not indicated<br>3: Severe symptoms or neurological deficit; intervention indicated<br>4: Life-threatening consequences; urgent intervention indicated<br>5: Death                                                                                                                                                                                                                                                                                                                                                                                                                    |
| <b>Ocular/Visual</b>                                                                                                                                                |                                                                              |                                                                                                                                                                                                                                                                                                                                                                                                                                                                                                                                                                                                                                                                                                                   |
| Cataract                                                                                                                                                            | <b>Modified</b><br>CTCAEv4.03<br>Eye disorders:<br>Cataracts                 | 1: Asymptomatic; clinical or diagnostic observations only; intervention not indicated ( <b>20/30 or better</b> )<br>2: Symptomatic; moderate decrease in visual acuity (20/40 or better)<br>3: Symptomatic with marked decrease in visual acuity (worse than 20/40 but better than 20/200); operative intervention indicated (e.g., cataract surgery)<br>4: Blindness (20/200 or worse)in the affected eye<br>5: Not applicable                                                                                                                                                                                                                                                                                   |
| Diplopia                                                                                                                                                            | <b>Modified</b><br>CTCAEv4.03<br>Eye disorders:<br>Other, specify            | 1: Asymptomatic or mild symptoms; clinical or diagnostic observations only; intervention not indicated<br>2: Moderate; minimal, local or noninvasive intervention indicated; limiting age appropriate instrumental ADL<br>3: Severe or medically significant but not immediately sight threatening; hospitalization or prolongation of existing hospitalization indicated; disabling; limiting self-care ADL<br><b>4: Not applicable</b><br><b>5: Not applicable</b>                                                                                                                                                                                                                                              |
| Dry eye syndrome<br>(Includes: Keratitis sicca, xerophthalmia, kerato-conjunctivitis sicca, Sjogren's syndrome, lacrimal duct atrophy, limbal stem cell deficiency) | CTCAEv4.03<br>Eye disorders:<br>Dry eye                                      | 1: Asymptomatic; clinical or diagnostic observations only; mild symptoms relieved by lubricants<br>2: Symptomatic; multiple agents indicated; limiting instrumental ADL<br>3: Decrease in visual acuity (<20/40); limiting self-care ADL<br>4: Not applicable<br>5: Not applicable                                                                                                                                                                                                                                                                                                                                                                                                                                |

| Organ/System                                                                                                    | Grading Source                                                    | Grading Rubric                                                                                                                                                                                                                                                                                                                                                                                                                                                                                                                                         |
|-----------------------------------------------------------------------------------------------------------------|-------------------------------------------------------------------|--------------------------------------------------------------------------------------------------------------------------------------------------------------------------------------------------------------------------------------------------------------------------------------------------------------------------------------------------------------------------------------------------------------------------------------------------------------------------------------------------------------------------------------------------------|
| Eyelid function disorder<br><br>(Includes: entropion, ectropion, lagophthalmos, ptosis)                         | CTCAEv4.03<br>Eye disorders:<br>Eyelid function                   | 1: Asymptomatic; clinical or diagnostic observations only; intervention not indicated<br>2: Symptomatic; non-operative intervention indicated; limiting instrumental ADL<br>3: Limiting self-care ADL; operative intervention indicated<br>4: Not applicable<br>5: Not applicable                                                                                                                                                                                                                                                                      |
| Glaucoma                                                                                                        | CTCAEv4.03<br>Eye disorders:<br>Glaucoma                          | 1: Elevated intraocular pressure (EIOP) with single topical agent for intervention; no visual field deficit<br>2: EIOP causing early visual field deficits; multiple topical or oral agents indicated; limiting instrumental ADL<br>3: EIOP causing marked visual field deficits (e.g., involving both superior and inferior visual fields); operative intervention indicated; limiting self-care ADL<br>4: Blindness (20/200 or worse) in the affected eye<br>5: Not applicable                                                                       |
| Ocular disease, noninfectious<br><br>(Includes: chorioretinitis, uveitis, iritis, scleritis)                    | CTCAEv4.03<br>Eye disorders:<br>Other, specify                    | 1: Asymptomatic or mild symptoms; clinical or diagnostic observations only; intervention not indicated<br>2: Moderate; minimal, local or noninvasive intervention indicated; limiting age appropriate instrumental ADL<br>3: Severe or medically significant but not immediately sight threatening; hospitalization or prolongation of existing hospitalization indicated; disabling; limiting self-care ADL<br>4: Sight-threatening consequences; urgent intervention indicated; blindness (20/200 or worse) in the affected eye<br>5: Not applicable |
| Ocular surface disease<br><br>(Includes: conjunctivitis, chronic, keratitis, keratoconjunctivitis, keratopathy) | CTCAEv4.03<br>Eye disorders:<br>Keratitis                         | 1: Not applicable<br>2: Symptomatic; medical intervention indicated (e.g., topical agents); limiting instrumental ADL<br>3: Decline in vision (worse than 20/40 but better than 20/200); limiting self-care ADL<br>4: Perforation or blindness (20/200 or worse) in the affected eye<br>5: Not applicable                                                                                                                                                                                                                                              |
| Orbital prosthetic complications<br><br>(Includes: displacement, exposure, giant papillary conjunctivitis)      | <b>Modified</b><br>CTCAEv4.03<br>Eye disorders:<br>Other, specify | 1: Asymptomatic or mild symptoms; clinical or diagnostic observations only; intervention not indicated<br>2: Moderate; minimal, local or noninvasive intervention indicated; limiting age appropriate instrumental ADL<br>3: Severe or medically significant; hospitalization or prolongation of existing hospitalization indicated; disabling; limiting self-care ADL<br><b>4: Not applicable</b><br><b>5: Not applicable</b>                                                                                                                         |
| Photophobia                                                                                                     | CTCAEv4.03<br>Eye disorders:<br>Photophobia                       | 1: Symptomatic but not limiting ADL<br>2: Limiting instrumental ADL<br>3: Limiting self-care ADL<br>4: Not applicable<br>5: Not applicable                                                                                                                                                                                                                                                                                                                                                                                                             |
| Phthisis bulbi<br><br>(Defined as blind, painful eye)                                                           | CTCAEv4.03<br>Eye disorders:<br>Eye pain                          | 1: Mild pain<br>2: Moderate pain; limiting instrumental ADL<br>3: Severe pain; limiting self-care ADL<br>4: Not applicable<br>5: Not applicable                                                                                                                                                                                                                                                                                                                                                                                                        |



| Organ/System                                                                                                       | Grading Source                                                          | Grading Rubric                                                                                                                                                                                                                                                                                                                                                                                                                                                                                                                                                                            |
|--------------------------------------------------------------------------------------------------------------------|-------------------------------------------------------------------------|-------------------------------------------------------------------------------------------------------------------------------------------------------------------------------------------------------------------------------------------------------------------------------------------------------------------------------------------------------------------------------------------------------------------------------------------------------------------------------------------------------------------------------------------------------------------------------------------|
| Retinal detachment                                                                                                 | <b>Modified</b><br>CTCAEv4.03<br>Eye disorders:<br>Retinal detachment   | 1: Asymptomatic<br>2: <b>Rhegmatogenous</b> or exudative and visual acuity 20/40 or better<br>3: Rhegmatogenous or exudative detachment; operative intervention indicated; decline in vision (worse than 20/40 but better than 20/200)<br>4: Blindness (20/200 or worse) in the affected eye<br>5: Not applicable                                                                                                                                                                                                                                                                         |
| Retinopathy                                                                                                        | CTCAEv4.03<br>Eye disorders:<br>Retinopathy                             | 1: Asymptomatic; clinical or diagnostic observations only<br>2: Symptomatic with moderate decrease in visual acuity (20/40 or better); limiting instrumental ADL<br>3: Symptomatic with marked decrease in visual acuity (worse than 20/40); disabling; limiting self-care ADL<br>4: Blindness (20/200 or worse) in the affected eye<br>5: Not applicable                                                                                                                                                                                                                                 |
| Strabismus<br><br>(Includes: esotropia, exotropia, hypertropia, Parinaud's syndrome, Internuclear ophthalmoplegia) | CTCAEv4.03<br>Eye disorders:<br>Other, specify                          | 1: Asymptomatic or mild symptoms; clinical or diagnostic observations only; intervention not indicated<br>2: Moderate; minimal, local or noninvasive intervention indicated; limiting age appropriate instrumental ADL<br>3: Severe or medically significant but not immediately sight threatening; hospitalization or prolongation of existing hospitalization indicated; disabling; limiting self-care ADL<br>4: Sight-threatening consequences; urgent intervention indicated; blindness (20/200 or worse) in the affected eye<br>5: Not applicable                                    |
| Visual acuity, reduced (OD)                                                                                        | <b>Modified</b><br>CTCAEv4.03<br>Eye disorders:<br>Optic nerve disorder | 1: Asymptomatic; clinical or diagnostic observations only ( <b>reduced visual acuity corrected to 20/40 or better</b> )<br>2: Limiting vision of the affected eye ( <b>reduced visual acuity corrected to less than 20/40 but better than 20/60</b> )<br>3: Limiting vision in the affected eye ( <b>reduced visual acuity corrected to 20/60 but better than 20/200</b> )<br>4: Blindness ( <b>corrected to 20/200 or worse, includes count fingers, hand motion, light perception only</b> ) in the affected eye ( <b>cortical blindness, enucleation</b> )<br>5: <b>Not applicable</b> |
| Visual acuity, reduced (OS)                                                                                        | <b>Modified</b><br>CTCAEv4.03<br>Eye disorders:<br>Optic nerve disorder | 1: Asymptomatic; clinical or diagnostic observations only ( <b>reduced visual acuity corrected to 20/40 or better</b> )<br>2: Limiting vision of the affected eye ( <b>reduced visual acuity corrected to less than 20/40 but better than 20/60</b> )<br>3: Limiting vision in the affected eye ( <b>reduced visual acuity corrected to 20/60 but better than 20/200</b> )<br>4: Blindness ( <b>corrected to 20/200 or worse, includes count fingers, hand motion, light perception only</b> ) in the affected eye ( <b>cortical blindness, enucleation</b> )<br>5: <b>Not applicable</b> |

| Organ/System                                                                                                                                                                                                                                                      | Grading Source                                                                                      | Grading Rubric                                                                                                                                                                                                                                                                                                                                                                                                                                                                                                                                                                                                                        |
|-------------------------------------------------------------------------------------------------------------------------------------------------------------------------------------------------------------------------------------------------------------------|-----------------------------------------------------------------------------------------------------|---------------------------------------------------------------------------------------------------------------------------------------------------------------------------------------------------------------------------------------------------------------------------------------------------------------------------------------------------------------------------------------------------------------------------------------------------------------------------------------------------------------------------------------------------------------------------------------------------------------------------------------|
| Visual field deficit                                                                                                                                                                                                                                              | <b>Modified</b><br>CTCAEv4.03<br>Eye disorders:<br>Other, specify                                   | 1: Asymptomatic or mild symptoms; clinical or diagnostic observations only; intervention not indicated<br>2: Moderate; minimal, local or noninvasive intervention indicated; limiting age appropriate instrumental ADL ( <b>can't drive</b> )<br>3: Severe or medically significant but not immediately sight threatening; hospitalization or prolongation of existing hospitalization indicated; disabling; limiting self-care ADL ( <b>can't ambulate/navigate</b> )<br><b>4: Not applicable</b><br><b>5: Not applicable</b>                                                                                                        |
| <b>Pulmonary</b>                                                                                                                                                                                                                                                  |                                                                                                     |                                                                                                                                                                                                                                                                                                                                                                                                                                                                                                                                                                                                                                       |
| Asthma<br><br>(Based on physician diagnosis by appropriate clinical signs and symptoms, <u>reversible</u> airway obstruction)                                                                                                                                     | <b>Modified</b><br>CTCAEv4.03<br>Respiratory, thoracic and mediastinal disorders:<br>Bronchospasm   | 1: Mild symptoms; intervention not Indicated<br>2: Symptomatic; medical intervention indicated; limiting instrumental ADL; <b>intermittent asthma requiring short-acting beta agonists as needed</b><br>3: Limiting self-care ADL; oxygen saturation decreased; <b>persistent asthma requiring daily controller medication (oral or inhaled)</b><br>4: Life-threatening respiratory or hemodynamic compromise; intubation or urgent intervention indicated<br>5: Death                                                                                                                                                                |
| Chronic obstructive pulmonary disease (COPD)<br><br>(Based on physician diagnosis by appropriate clinical signs and symptoms, <u>irreversible</u> airway obstruction; includes emphysema, chronic bronchitis, and mixed chronic obstructive asthma/COPD syndrome) | <b>Modified</b><br>CTCAEv4.03<br>Respiratory, thoracic and mediastinal disorders:<br>Other, specify | 1: Asymptomatic or mild symptoms; clinical or diagnostic observations only; intervention not indicated<br>2: Moderate; minimal, local or noninvasive intervention indicated or initiated ( <b>inhaled medications</b> ); limiting age-appropriate instrumental ADL<br>3: Severe or medically significant but not immediately life-threatening ( <b>e.g., requiring supplementation of oxygen, systemic corticosteroids, BIPAP, or CPAP</b> ); hospitalization or prolongation of existing hospitalization indicated; disabling; limiting self-care ADL<br>4: Life-threatening consequences; urgent intervention indicated<br>5: Death |
| Epistaxis, chronic/recurrent<br><br>(Defined as 3 events in last 6 months)                                                                                                                                                                                        | CTCAEv4.03<br>Respiratory, thoracic and mediastinal disorders:<br>Epistaxis                         | 1: Mild symptoms; intervention not Indicated<br>2: Moderate symptoms; medical intervention indicated (e.g., nasal packing, cauterization; topical vasoconstrictors)<br>3: Transfusion, radiologic, endoscopic, or operative intervention indicated (e.g., hemostasis of bleeding site)<br>4: Life-threatening consequences; urgent intervention indicated<br>5: Death                                                                                                                                                                                                                                                                 |
| Obstructive sleep apnea                                                                                                                                                                                                                                           | <b>New category and grading source</b><br>Multidisciplinary team consensus                          | <b>1: Documentation of apnea; no need for medication</b><br><b>2: Documentation of mild apnea; behavioral intervention initiated or indicated</b><br><b>3: Documentation of moderate apnea; CPAP initiated or indicated</b><br><b>4: Documentation of severe apnea with secondary complications (CHF, HTN, headache)</b><br><b>5: Not applicable</b>                                                                                                                                                                                                                                                                                  |

| Organ/System                                                                                                                                                                                                                                                                                                                                                                                                                                                                                                                 | Grading Source                                                                                                                                       | Grading Rubric                                                                                                                                                                                                                                                                                                                                                                                                                   |
|------------------------------------------------------------------------------------------------------------------------------------------------------------------------------------------------------------------------------------------------------------------------------------------------------------------------------------------------------------------------------------------------------------------------------------------------------------------------------------------------------------------------------|------------------------------------------------------------------------------------------------------------------------------------------------------|----------------------------------------------------------------------------------------------------------------------------------------------------------------------------------------------------------------------------------------------------------------------------------------------------------------------------------------------------------------------------------------------------------------------------------|
| <p>Obstructive ventilatory defect</p> <p><b>(Defined by FEV1 &lt; 80% predicted and &lt;LLN. Disorders associated with this pattern and reduced FEV1/FVC ratio (obstructive ventilatory defect) include: asthma, COPD, tracheobronchomalacia, obliterative bronchiolitis and bronchiectasis. Disorders associated with this pattern and normal or increased FEV1/FVC (possible restrictive ventilatory defect, confirm with TLC) include pulmonary fibrosis, other interstitial lung diseases, chest wall disorders)</b></p> | <p><b>New grading source</b></p> <p>Pellegrino et al, Interpretative strategies for lung function tests. Eur Resp J 2005;26:948-968.<br/>Table 6</p> | <p><b>1: FEV1 (percentages of observed FEV1 related to its predicted value): 79-70% predicted</b><br/> <b>2: FEV1: 69-50% predicted</b><br/> <b>3: FEV1: 49-35% predicted</b><br/> <b>4: FEV1: &lt;35% predicted</b><br/> <b>5: Not applicable</b></p>                                                                                                                                                                           |
| <p>Pleural space disorders</p> <p>(Includes: pleural effusions, chylothorax, hemothorax)</p>                                                                                                                                                                                                                                                                                                                                                                                                                                 | <p><b>Modified</b><br/>CTCAEv4.03<br/>Respiratory, thoracic and mediastinal disorders<br/>Pneumothorax</p>                                           | <p>1: Asymptomatic or mild symptoms; clinical or diagnostic observations only; intervention not indicated<br/> 2: <b>Moderate to severe</b> symptoms and <b>non-operative</b> intervention indicated (e.g., tube placement without sclerosis)<br/> 3: <b>Sclerosis and/or operative intervention indicated</b>; hospitalization indicated<br/> 4: Life-threatening consequences; urgent intervention indicated<br/> 5: Death</p> |
| <p>Pneumonitis</p>                                                                                                                                                                                                                                                                                                                                                                                                                                                                                                           | <p><b>Modified</b><br/>CTCAEv4.03<br/>Respiratory, thoracic and mediastinal disorders:<br/>Pneumonitis</p>                                           | <p>1: <b>Not applicable</b><br/> 2: Symptomatic; medical intervention indicated; limiting instrumental ADL<br/> 3: Severe symptoms; limiting self-care ADL; oxygen indicated<br/> 4: Life-threatening respiratory compromise; urgent intervention indicated (e.g., tracheotomy or intubation)<br/> 5: Death</p>                                                                                                                  |
| <p>Pulmonary diffusion defect</p> <p><b>(Defined by DLCOcorr &lt; 75% predicted and &lt;LLN. Includes: pneumonitis, pulmonary fibrosis, other interstitial lung diseases, pulmonary vascular disorders and emphysema)</b></p>                                                                                                                                                                                                                                                                                                | <p><b>New grading source</b></p> <p>Pellegrino et al, Interpretative strategies for lung function tests. Eur Resp J 2005;26:948-968. Table 14</p>    | <p><b>1: DLCO: 74-60% predicted</b><br/> <b>2: DLCO: &lt;60%-40% predicted</b><br/> <b>3: DLCO: &lt;40% predicted</b><br/> <b>4: Not applicable</b><br/> <b>5: Not applicable</b></p>                                                                                                                                                                                                                                            |
| <p>Pulmonary embolism</p>                                                                                                                                                                                                                                                                                                                                                                                                                                                                                                    | <p><b>Modified</b><br/>CTCAEv4.03<br/>Vascular disorders:<br/>Thromboembolic event</p>                                                               | <p><b>1: Not applicable</b><br/> <b>2: Not applicable</b><br/> <b>3: Urgent medical intervention indicated</b><br/> 4: Life-threatening with hemodynamic or neurologic instability<br/> 5: Death</p>                                                                                                                                                                                                                             |

| Organ/System                                                                                                                                                                         | Grading Source                                                                                                                                                                                 | Grading Rubric                                                                                                                                                                                                                                                                                                                                                                                                                                                                    |
|--------------------------------------------------------------------------------------------------------------------------------------------------------------------------------------|------------------------------------------------------------------------------------------------------------------------------------------------------------------------------------------------|-----------------------------------------------------------------------------------------------------------------------------------------------------------------------------------------------------------------------------------------------------------------------------------------------------------------------------------------------------------------------------------------------------------------------------------------------------------------------------------|
| Respiratory tract hemorrhage                                                                                                                                                         | CTCAEv4.03<br>Respiratory, thoracic and mediastinal disorders:<br>Bronchopulmonary hemorrhage                                                                                                  | 1: Mild symptoms; intervention not Indicated<br>2: Moderate symptoms; medical intervention indicated<br>3: Transfusion, radiologic, endoscopic, or operative intervention indicated (e.g., hemostasis of bleeding site)<br>4: Life-threatening respiratory or hemodynamic compromise; intubation or urgent intervention indicated<br>5: Death                                                                                                                                     |
| Restrictive ventilatory defect<br><br>(Defined by TLC < 75% predicted and <LLN. Includes: pulmonary fibrosis and other interstitial lung disease, pneumonitis, chest wall disorders) | <b>New grading source</b><br><br>American Thoracic Society, Lung Function Testing: Selection of Reference Values and Interpretative Strategies. Am Rev Respir Dis 1991;144:1202-1218. Table 13 | <b>1: TLC: 74 -70%</b><br><b>2: TLC: 69 - 60% predicted; limiting instrumental ADL</b><br><b>3: TLC: &lt;60% predicted; limiting self-care ADL</b><br><b>4: Not applicable</b><br><b>5: Not applicable</b>                                                                                                                                                                                                                                                                        |
| Tracheal aspiration                                                                                                                                                                  | CTCAEv4.03<br>Respiratory, thoracic and mediastinal disorders:<br>Aspiration                                                                                                                   | 1: Asymptomatic; clinical or diagnostic observations only; intervention not indicated<br>2: Altered eating habits; coughing or choking episodes after eating or swallowing; medical intervention indicated (e.g., suction or oxygen)<br>3: Dyspnea and pneumonia symptoms (e.g., aspiration pneumonia); hospitalization indicated; unable to aliment orally<br>4: Life-threatening respiratory or hemodynamic compromise; intubation or urgent intervention indicated<br>5: Death |
| Tracheal stenosis                                                                                                                                                                    | CTCAEv4.03<br>Respiratory, thoracic and mediastinal disorders:<br>Tracheal stenosis                                                                                                            | 1: Asymptomatic; clinical or diagnostic observations only; intervention not indicated<br>2: Symptomatic (e.g., noisy airway breathing), but causing no respiratory distress; medical management indicated (e.g., steroids)<br>3: Stridor or respiratory distress limiting self-care ADL; endoscopic intervention indicated (e.g., stent, laser)<br>4: Life-threatening airway compromise; urgent intervention indicated (e.g., tracheotomy or intubation)<br>5: Death             |
| <b>Renal/Urinary Tract</b>                                                                                                                                                           |                                                                                                                                                                                                |                                                                                                                                                                                                                                                                                                                                                                                                                                                                                   |
| Acute kidney injury                                                                                                                                                                  | <b>Modified</b><br>CTCAEv4.03<br>Renal and urinary disorders:<br>Acute kidney injury                                                                                                           | 1: Creatinine 1.5-2.0 x above <b>age-specific ULN</b><br>2: Creatinine 2 - 3 x above <b>age-specific ULN</b><br>3: Creatinine >3 x <b>age-specific ULN</b> or >4.0 mg/dL; hospitalization indicated<br>4: Life-threatening consequences; dialysis indicated<br>5: Death                                                                                                                                                                                                           |
| Chronic hematuria<br><br>Defined as > 5 RBCs/hpf documented on more than one urinalysis                                                                                              | <b>Modified</b><br>CTCAEv4.03<br>Renal and urinary disorders:<br>Hematuria                                                                                                                     | 1: Asymptomatic; clinical or diagnostic observations only; intervention not indicated<br>2: Symptomatic; urinary catheter or bladder irrigation indicated; limiting instrumental ADL<br>3: Gross hematuria; transfusion, IV medications or hospitalization indicated; <b>elective invasive intervention indicated</b> ; limiting self-care ADL<br>4: Life-threatening consequences; urgent invasive intervention indicated<br>5: Death                                            |

| Organ/System                                                                                                                   | Grading Source                                                                                                                                                                                                                                                                                                                         | Grading Rubric                                                                                                                                                                                                                                                                                                                                                                                                                                                                                                            |
|--------------------------------------------------------------------------------------------------------------------------------|----------------------------------------------------------------------------------------------------------------------------------------------------------------------------------------------------------------------------------------------------------------------------------------------------------------------------------------|---------------------------------------------------------------------------------------------------------------------------------------------------------------------------------------------------------------------------------------------------------------------------------------------------------------------------------------------------------------------------------------------------------------------------------------------------------------------------------------------------------------------------|
| Chronic kidney disease<br><br>Includes CKD requiring dialysis/transplant                                                       | <b>Modified</b><br>CTCAEv4.03<br>Renal and urinary disorders:<br>Chronic kidney disease<br><br>eGFR estimated used in the KDIGO estimating equations:<br><a href="http://www.kdigo.org/clinical_practice_guidelines/pdf/CKD/KDIGO_2012_CKD_GL.pdf">http://www.kdigo.org/clinical_practice_guidelines/pdf/CKD/KDIGO_2012_CKD_GL.pdf</a> | 1: eGFR (estimated Glomerular Filtration Rate) or CrCl (creatinine clearance) <LLN – 60 ml/min/1.73 m <sup>2</sup> <b>AND proteinuria 1+</b> present; urine protein/creatinine >0.5<br>2: eGFR or CrCl 59-30 ml/min/1.73 m <sup>2</sup> ; <b>medication (e.g., electrolytes, ACE inhibition, etc....) indicated or initiated</b><br>3: eGFR or CrCl 29-15 ml/min/1.73 m <sup>2</sup><br>4: eGFR or CrCl <15 ml/min/1.73 m <sup>2</sup> ; dialysis or renal transplant indicated <b>or initiated/performed</b><br>5: Death |
| Incontinence                                                                                                                   | CTCAEv4.03<br>Renal and urinary disorders:<br>Urinary incontinence                                                                                                                                                                                                                                                                     | 1: Occasional (e.g., with coughing, sneezing, etc.), pads not indicated<br>2: Spontaneous; pads indicated; limiting instrumental ADL<br>3: Intervention indicated (e.g., clamp, collagen injections); operative intervention indicated; limiting self-care ADL<br>4: Not applicable<br>5: Not applicable                                                                                                                                                                                                                  |
| Obstructive uropathy<br><br>(Includes: urinary tract stenosis; urinary tract stricture)                                        | <b>Modified</b><br>CTCAEv4.03<br>Renal and urinary disorders:<br>Urinary tract obstruction                                                                                                                                                                                                                                             | 1: Asymptomatic; clinical or diagnostic observations only<br>2: Symptomatic but no hydronephrosis, sepsis or renal dysfunction; urethral dilation, urinary or suprapubic catheter indicated<br>3: Symptomatic and altered organ function (e.g., hydronephrosis, or renal dysfunction); <b>elective invasive intervention indicated</b><br>4: Life-threatening consequences; urgent <b>invasive</b> intervention indicated<br>5: Death                                                                                     |
| Urinary bladder dysfunction<br><br>(Includes: dysfunctional voiding, hypertonic bladder, urinary frequency, urinary hesitancy) | <b>Modified</b><br>CTCAEv4.03<br>Renal and urinary disorders:<br>Urinary frequency<br>Urinary urgency                                                                                                                                                                                                                                  | 1: Present<br>2: Limiting instrumental ADL; medical management indicated <b>or initiated</b><br>3: <b>Surgical management indicated or initiated (e.g., trans-electrical nerve stimulation, sacral neural modulation)</b><br>4: Not applicable<br>5: Not applicable                                                                                                                                                                                                                                                       |
| Urinary tract calculi<br><br>(Includes: renal calculi, bladder stone/calculi, ureteral calculi)                                | <b>Modified</b><br>CTCAEv4.03<br>Renal and urinary disorders:<br>Renal calculi                                                                                                                                                                                                                                                         | 1: Asymptomatic or mild symptoms; occasional use of nonprescription analgesics indicated<br>2: Symptomatic; oral antiemetics indicated; around the clock nonprescription analgesics or any oral narcotic analgesics indicated<br>3: Hospitalization indicated; IV intervention (e.g., analgesics, antiemetics); <b>elective invasive intervention indicated</b><br>4: Life-threatening consequences; <b>urgent invasive intervention indicated</b><br>5: Death                                                            |
| Vesicoureteral reflux, acquired                                                                                                | CTCAEv4.03<br>Renal and urinary disorders:<br>Other, specify                                                                                                                                                                                                                                                                           | 1: Asymptomatic or mild symptoms; clinical or diagnostic observations only; intervention not indicated<br>2: Moderate, local or noninvasive intervention indicated; limiting instrumental ADL<br>3: Severe or medically significant but not immediately life threatening; hospitalization or prolongation of existing hospitalization indicated; disabling; limiting self-care ADL<br>4: Life-threatening consequences; urgent intervention indicated<br>5: Death                                                         |

| Organ/System                                                              | Grading Source                                                                                | Grading Rubric                                                                                                                                                                                                                                                                                                                                                                                                                                                                                                                                                        |
|---------------------------------------------------------------------------|-----------------------------------------------------------------------------------------------|-----------------------------------------------------------------------------------------------------------------------------------------------------------------------------------------------------------------------------------------------------------------------------------------------------------------------------------------------------------------------------------------------------------------------------------------------------------------------------------------------------------------------------------------------------------------------|
| <b>Reproductive/Genital</b>                                               |                                                                                               |                                                                                                                                                                                                                                                                                                                                                                                                                                                                                                                                                                       |
| Abnormal sperm concentration<br><br>(Includes: oligospermia, azoospermia) | <b>Modified</b><br>Reproductive system and breast disorders:<br>Oligospermia<br>Azoospermia   | <b>1: Not applicable</b><br><b>2: Sperm concentration &gt; 0 but &lt; 15 million spermatozoa/mL</b><br>3: Absence of sperm in ejaculate<br>4: Not applicable<br>5: Not applicable                                                                                                                                                                                                                                                                                                                                                                                     |
| Cervical dysplasia                                                        | <b>Modified</b><br>CTCAE v4.03<br>Reproductive system and breast disorder:<br>Other, specify  | 1: Asymptomatic or mild symptoms; clinical or diagnostic observations only; intervention not indicated<br>2: Moderate; minimal, local or non-invasive intervention indicated; limiting age appropriate instrumental ADL ( <b>e.g., colposcopy</b> )<br>3: Severe or medically significant but not immediately life threatening; hospitalization or prolongation of existing hospitalization indicated; disabling; limiting self-care ADL ( <b>e.g., conization for carcinoma-in-situ</b> )<br><b>4: Not applicable</b><br><b>5: Not applicable</b>                    |
| Dysfunctional uterine bleeding                                            | CTCAE v4.03<br>Reproductive system and breast disorders<br>Menorrhagia                        | 1: Mild; iron supplements indicated<br>2: Moderate symptoms; medical intervention indicated (e.g., hormones)<br>3: Severe; transfusion indicated; surgical intervention indicated (e.g., hysterectomy)<br>4: Life-threatening consequences; urgent intervention indicated<br>5: Death                                                                                                                                                                                                                                                                                 |
| Dyspareunia                                                               | CTCAE v4.03<br>Reproductive system and breast disorders:<br>Dyspareunia                       | 1: Mild discomfort or pain associated with vaginal penetration; discomfort relieved with use of vaginal lubricants or estrogen<br>2: Moderate discomfort or pain associated with vaginal penetration; discomfort or pain partially relieved with use of vaginal lubricants or estrogen<br>3: Severe discomfort or pain associated with vaginal penetration; discomfort or pain unrelieved by vaginal lubricants or estrogen<br>4: Not applicable<br>5: Not applicable                                                                                                 |
| Endometriosis                                                             | <b>Modified</b><br>CTCAE v4.03<br>Reproductive system and breast disorders:<br>Other, specify | 1: Asymptomatic or mild symptoms; clinical or diagnostic observations only; intervention not indicated<br>2: Moderate; minimal, local or noninvasive intervention indicated; limiting age appropriate instrumental ADL ( <b>e.g., medical management</b> )<br>3: Severe or medically significant but not immediately life threatening; hospitalization or prolongation of existing hospitalization indicated; disabling; limiting self-care ADL ( <b>e.g., surgical intervention</b> )<br>4: Life-threatening consequences; urgent intervention indicated<br>5: Death |

| Organ/System                             | Grading Source                                                                                | Grading Rubric                                                                                                                                                                                                                                                                                                                                                                                                                                                                                                                                                                                                                                                                        |
|------------------------------------------|-----------------------------------------------------------------------------------------------|---------------------------------------------------------------------------------------------------------------------------------------------------------------------------------------------------------------------------------------------------------------------------------------------------------------------------------------------------------------------------------------------------------------------------------------------------------------------------------------------------------------------------------------------------------------------------------------------------------------------------------------------------------------------------------------|
| Erectile dysfunction                     | CTCAE v4.03<br>Reproductive system and breast disorders:<br>Erectile dysfunction              | 1: Decrease in erectile function (frequency or rigidity of erections) but intervention not indicated (e.g., medication or use of mechanical device, penile pump)<br>2: Decrease in erectile function (frequency/ rigidity of erections), erectile intervention indicated, (e.g., medication or mechanical devices such as penile pump)<br>3: Decrease in erectile function (frequency/ rigidity of erections) but erectile intervention not helpful (e.g., medication or mechanical devices such as penile pump); placement of a permanent penile prosthesis indicated (not previously present)<br>4: Not applicable<br>5: Not applicable                                             |
| Genitourinary adhesions                  | CTCAE v4.03<br>Reproductive system and breast disorders:<br>Other, specify                    | 1: Asymptomatic or mild symptoms; clinical or diagnostic observations only; intervention not indicated<br>2: Moderate; minimal, local or noninvasive intervention indicated; limiting age appropriate instrumental ADL<br>3: Severe or medically significant but not immediately life threatening; hospitalization or prolongation of existing hospitalization indicated; disabling; limiting self-care ADL<br>4: Life-threatening consequences; urgent intervention indicated<br>5: Death                                                                                                                                                                                            |
| Hypogonadism, central (hypogonadotropic) | <b>Modified</b><br>CTCAE v4.03<br>Investigations:<br>Blood gonadotropin abnormal              | 1: Asymptomatic; clinical or diagnostic observations only; intervention not indicated<br>2: Symptomatic; medical intervention indicated <b>or initiated</b> ; limiting instrumental ADL<br>3: Severe symptoms; medical intervention indicated <b>or initiated</b> ; limiting self-care ADL<br>4: Not applicable<br>5: Not applicable                                                                                                                                                                                                                                                                                                                                                  |
| Leydig cell insufficiency                | <b>Modified</b><br>CTCAE v4.03<br>Reproductive system and breast disorders:<br>Other, specify | 1: Asymptomatic; clinical or diagnostic observations only; intervention not indicated<br>2: Symptomatic; medical intervention indicated <b>or initiated</b> ; limiting instrumental ADL<br>3: Severe symptoms; medical intervention indicated <b>or initiated</b> ; limiting self-care ADL<br><b>4: Not applicable</b><br><b>5: Not applicable</b>                                                                                                                                                                                                                                                                                                                                    |
| Polycystic ovarian syndrome              | <b>Modified</b><br>CTCAE v4.03<br>Reproductive system and breast disorders<br>Other, specify  | 1: Asymptomatic or mild symptoms; clinical or diagnostic observations only; intervention not indicated ( <b>e.g., mild signs/symptoms of hyperandrogenemia</b> )<br>2: Moderate; minimal, local or noninvasive intervention indicated; limiting age appropriate instrumental ADL ( <b>e.g., more severe hirsutism, irregular menses; need for metformin or hormone replacement</b> )<br>3: Severe or medically significant but not immediately life threatening; hospitalization or prolongation of existing hospitalization indicated; disabling; limiting self-care ADL ( <b>e.g., need for surgery for cyst or bleed</b> )<br><b>4: Not applicable</b><br><b>5: Not applicable</b> |
| Precocious puberty                       | <b>Modified</b><br>CTCAE v4.03<br>Endocrine disorders:<br>Precocious puberty                  | <b>1: Not applicable</b><br>2: Physical signs and biochemical markers of puberty for females <8 years and males <9 years<br>3: Not applicable<br>4: Not applicable<br>5: Not applicable                                                                                                                                                                                                                                                                                                                                                                                                                                                                                               |

| Organ/System                  | Grading Source                                                                                   | Grading Rubric                                                                                                                                                                                                                                                                                                                                                                  |
|-------------------------------|--------------------------------------------------------------------------------------------------|---------------------------------------------------------------------------------------------------------------------------------------------------------------------------------------------------------------------------------------------------------------------------------------------------------------------------------------------------------------------------------|
| Primary ovarian failure       | CTCAE v4.03<br>Reproductive system and breast disorders:<br>Premature menopause                  | 1: Not applicable<br>2: Not applicable<br>3: Present<br>4: Not applicable<br>5: Not applicable                                                                                                                                                                                                                                                                                  |
| Prostatic hypertrophy, benign | CTCAEv4.03<br>Reproductive system and breast disorders:<br>Prostatic obstruction                 | 1: Diagnostic observations only; intervention not indicated<br>2: Mild symptoms; elective intervention indicated<br>3: Severe symptoms; elective operative intervention indicated<br>4: Not applicable<br>5: Not applicable                                                                                                                                                     |
| Retrograde ejaculation        | CTCAE v4.03<br>Reproductive system and breast disorders:<br>Ejaculation disorder                 | 1: Diminished ejaculation<br>2: Anejaculation or retrograde ejaculation<br>3: Not applicable<br>4: Not applicable<br>5: Not applicable                                                                                                                                                                                                                                          |
| Vaginal fistula               | CTCAE v4.03<br>Reproductive system and breast disorders:<br>Female genital tract fistula         | 1: Asymptomatic clinical or diagnostic observations only; intervention not indicated<br>2: Symptomatic and intervention not indicated<br>3: Severe symptoms; elective operative intervention indicated<br>4: Life-threatening consequences; urgent intervention indicated<br>5: Death                                                                                           |
| Vaginal stenosis              | <b>Modified</b><br>CTCAE v4.03<br>Reproductive system and breast disorders:<br>Vaginal stricture | 1: Asymptomatic; mild vaginal shortening or narrowing<br>2: Vaginal narrowing and/or shortening not interfering with physical examination<br>3: Vaginal narrowing and/or shortening interfering with the use of tampons, sexual activity or physical examination ( <b>e.g., surgical intervention indicated or performed</b> )<br>4: Not applicable<br><b>5: Not applicable</b> |

Bolded font represents modified or new categories or grading criteria.



## Supplemental Tables

**Supplemental Table 2. Patient characteristics of HCT and conventional chemotherapy recipients**

| Variables                                     | HCT<br>(n=112) |               | Conventional Therapy<br>(n=1106) |               | P                 |
|-----------------------------------------------|----------------|---------------|----------------------------------|---------------|-------------------|
| <b>Sex, n (%)</b>                             |                |               |                                  |               | 0.766             |
| Female                                        | 55             | 49.1          | 525                              | 47.5          |                   |
| Male                                          | 57             | 50.9          | 581                              | 52.5          |                   |
| <b>Race, n (%)</b>                            |                |               |                                  |               | <b>&lt; 0.001</b> |
| White                                         | 90             | 80.4          | 941                              | 85.1          |                   |
| Black                                         | 10             | 8.9           | 142                              | 12.8          |                   |
| Other                                         | 12             | 10.7          | 23                               | 2.1           |                   |
| <b>Ethnicity, n (%)</b>                       |                |               |                                  |               | <b>0.002</b>      |
| Hispanic                                      | 11             | 9.8           | 34                               | 3.1           |                   |
| Non-Hispanic                                  | 101            | 90.2          | 1072                             | 96.9          |                   |
| <b>Age at baseline, mean (sd, range)</b>      | 28.4           | 5.9,18.8-43.4 | 29.3                             | 6.2,18.4-47.6 | 0.122             |
| <b>Time since diagnosis, mean (sd, range)</b> | 18.5           | 4.2,11.3-28.5 | 19.9                             | 5.1,10.5-32.9 | <b>0.002</b>      |
| <b>Age at diagnosis, mean (sd, range)</b>     | 9.8            | 5.3, 0.5-18.8 | 9.4                              | 5.5, 0.2-21.8 | 0.425             |
| <b>Diagnosis, n (%)</b>                       |                |               |                                  |               | <b>&lt; 0.001</b> |
| <b>Leukemia</b>                               | 94             | 83.9          | 693                              | 62.7          |                   |
| ALL                                           | 23             | 20.5          | 649                              | 58.7          |                   |
| AML                                           | 44             | 39.3          | 42                               | 3.8           |                   |
| CML                                           | 16             | 14.3          | 0                                | 0.0           |                   |
| Other Leukemia                                | 1              | 0.9           | 2                                | 0.2           |                   |
| Myelodysplastic Syndrome                      | 10             | 8.9           | 0                                | 0.0           |                   |
| <b>Lymphoma</b>                               | 18             | 16.1          | 413                              | 37.3          |                   |
| Hodgkin lymphoma                              | 8              | 7.1           | 259                              | 23.4          |                   |
| Non-Hodgkin lymphoma                          | 10             | 8.9           | 154                              | 13.9          |                   |
| <b>Income, n (%)</b>                          |                |               |                                  |               | 0.554             |
| < \$20,000                                    | 62             | 59.0          | 567                              | 54.0          |                   |
| \$20,000-39,000                               | 22             | 21.0          | 240                              | 23.0          |                   |
| \$40,000-59,000                               | 9              | 8.6           | 134                              | 12.8          |                   |
| > \$60,000                                    | 12             | 11.4          | 107                              | 10.2          |                   |
| <b>Education, n (%)</b>                       |                |               |                                  |               | 0.250             |
| Less than high school                         | 6              | 5.7           | 109                              | 10.2          |                   |
| High school graduate                          | 26             | 24.5          | 283                              | 26.6          |                   |
| Some college                                  | 27             | 25.5          | 303                              | 28.4          |                   |
| College                                       | 36             | 33.9          | 269                              | 25.2          |                   |
| Post-graduate level                           | 11             | 10.4          | 102                              | 9.6           |                   |
| <b>Independent Living, n (%)</b>              |                |               |                                  |               | <b>0.002</b>      |
| <b>Radiation n (%)</b>                        |                |               |                                  |               |                   |

|                                             |      |                  |      |                 |         |
|---------------------------------------------|------|------------------|------|-----------------|---------|
| TBI                                         | 82   | 73.2             | 0    | 0.0             | < 0.001 |
| Cranial                                     | 9    | 8.0              | 278  | 25.1            | < 0.001 |
| Chest                                       | 5    | 4.5              | 43   | 3.9             | 0.797   |
| Spine                                       | 7    | 6.3              | 42   | 3.8             | 0.206   |
| Neck                                        | 6    | 5.4              | 33   | 3.0             | 0.163   |
| <b>Chemotherapy, mean (sd, range)</b>       |      |                  |      |                 |         |
| Anthracyclines, mg/m <sup>2</sup> *         | 169  | 100, 41-596      | 140  | 94, 23-619      | 0.007   |
| Alkylators, mg/m <sup>2</sup> †             | 8692 | 8800, 1200-47788 | 7577 | 3970, 300-51367 | 0.196   |
| <b>Epipodophyllotoxins ‡</b>                |      |                  |      |                 |         |
| Teniposide, mg/m <sup>2</sup>               | 2808 | 2116, 459-7801   | 4012 | 2332, 150-21771 | 0.058   |
| Etoposide, mg/m <sup>2</sup>                | 2607 | 3585, 17-17481   | 7974 | 5410, 211-23251 | < 0.001 |
| <b>Steroid exposure, mean (sd, range) §</b> |      |                  |      |                 |         |
| Prednisone, mg/m <sup>2</sup>               | 4753 | 5047, 98-17520   | 4947 | 4209, 560-25414 | 0.765   |
| Dexamethasone, mg/m <sup>2</sup>            | 889  | 929, 22-2295     | 1592 | 491, 2-3400     | < 0.001 |
| <b>Transplant characteristics</b>           |      |                  |      |                 |         |
| <b>Stem cell source n (%)</b>               |      |                  |      |                 |         |
| Autologous                                  | 33   | 29.5             |      |                 |         |
| Allogeneic, sibling                         | 41   | 36.6             |      |                 |         |
| Allogeneic, unrelated                       | 34   | 30.4             |      |                 |         |
| Other                                       | 4    | 3.6              |      |                 |         |
| <b>Age at time of HCT, mean (sd, range)</b> | 11.4 | 5.3, 1.4-21.3    |      |                 |         |
| <b>Time since HCT, mean (sd, range)</b>     | 17.0 | 4.1, 10.6-28.3   |      |                 |         |
| <b>Conditioning n (%)</b>                   |      |                  |      |                 |         |
| TBI including                               | 82   | 73.2             |      |                 |         |
| Chemotherapy only                           | 30   | 26.8             |      |                 |         |
| <b>Chronic GVHD n (%)</b>                   |      |                  |      |                 |         |
| Yes                                         | 25   | 31.6             |      |                 |         |

Abbreviations: HCT, Hematopoietic stem cell transplantation; ALL, Acute lymphoblastic leukemia; AML, Acute myeloid leukemia; CML, chronic myeloid leukemia; TBI, Total body irradiation.

\* Includes doxorubicin, daunorubicin, idarubicin, mitoxantrone, and epirubicin doses expressed in doxorubicin equivalents.

† Includes BCNU (carmustine), busulfan, CCNU (lomustine), chlorambucil, cyclophosphamide, ifosfamide, melphalan, nitrogen mustard, procarbazine, and thiotepa expressed in cyclophosphamide equivalents.

‡ Includes teniposide and etoposide doses.

§ Includes steroid exposure as part of cancer directed therapy.

**Supplemental Table 3. Prevalence of grade 1-4 chronic conditions comparing HCT and conventional chemotherapy groups**

|                                        | HCT<br>(n=112) |       | Conventional<br>Therapy (n=1106) |      | p                 |
|----------------------------------------|----------------|-------|----------------------------------|------|-------------------|
|                                        | n              | %     | n                                | %    |                   |
| <b>Any grade 1-4</b>                   | 112            | 100.0 | 1101                             | 99.6 | 1.000             |
| <b>Cardiovascular conditions*</b>      | 101            | 90.2  | 955                              | 86.3 | 0.307             |
| Aortic root aneurysm                   | 4              | 3.6   | 71                               | 6.4  | 0.303             |
| Arteriovenous malformation             | 0              | 0.0   | 2                                | 0.2  | 1.000             |
| Atrial myxoma                          | 0              | 0.0   | 1                                | 0.1  | 1.000             |
| Atrioventricular heart block           | 2              | 1.8   | 8                                | 0.7  | 0.233             |
| Cardiac dysrhythmia                    | 5              | 4.5   | 15                               | 1.4  | <b>0.030</b>      |
| Cardiomyopathy                         | 10             | 8.9   | 71                               | 6.4  | 0.318             |
| Conduction abnormality                 | 23             | 20.5  | 276                              | 25.0 | 0.357             |
| Dyslipidemia - Hypercholesterolemia    | 59             | 52.7  | 412                              | 37.3 | <b>0.002</b>      |
| Dyslipidemia - Hypertriglyceridemia    | 71             | 63.4  | 334                              | 30.2 | <b>&lt; 0.001</b> |
| Heart valve disorder                   | 41             | 36.6  | 398                              | 36.0 | 0.918             |
| Hypertension                           | 64             | 57.1  | 609                              | 55.1 | 0.691             |
| Myocardial infarction                  | 3              | 2.7   | 25                               | 2.3  | 0.738             |
| Pericarditis                           | 0              | 0.0   | 2                                | 0.2  | 1.000             |
| Prolonged QT interval                  | 6              | 5.4   | 57                               | 5.2  | 0.825             |
| Pulmonary hypertension                 | 0              | 0.0   | 2                                | 0.2  | 1.000             |
| Raynaud's phenomenon                   | 2              | 1.8   | 12                               | 1.1  | 0.374             |
| Right ventricular systolic dysfunction | 0              | 0.0   | 3                                | 0.3  | 1.000             |
| Sinus bradycardia                      | 1              | 0.9   | 23                               | 2.1  | 0.718             |
| Sinus tachycardia                      | 10             | 8.9   | 42                               | 3.8  | <b>0.022</b>      |
| Thrombus                               | 5              | 4.5   | 33                               | 3.0  | 0.387             |
| Vascular disease                       | 2              | 1.8   | 21                               | 1.9  | 1.000             |
| <b>Endocrine System*</b>               | 96             | 85.7  | 923                              | 83.5 | 0.594             |
| Adrenal insufficiency                  | 8              | 7.1   | 23                               | 2.1  | <b>0.005</b>      |
| Adult GHD                              | 26             | 23.2  | 185                              | 16.7 | 0.089             |
| Childhood GHD                          | 16             | 14.3  | 54                               | 4.9  | <b>&lt; 0.001</b> |
| Glucose metabolism                     | 42             | 37.5  | 307                              | 27.8 | <b>0.037</b>      |
| Hyperparathyroidism                    | 0              | 0.0   | 2                                | 0.2  | 1.000             |
| Hyperprolactinemia                     | 1              | 0.9   | 1                                | 0.1  | 0.176             |
| Hyperthyroidism                        | 3              | 2.7   | 19                               | 1.7  | 0.447             |
| Hypoparathyroidism                     | 0              | 0.0   | 1                                | 0.1  | 1.000             |
| Hypothyroidism                         | 61             | 54.5  | 244                              | 22.1 | <b>&lt; 0.001</b> |
| Hypothyroidism compensated             | 1              | 0.9   | 3                                | 0.3  | 0.321             |
| Obesity                                | 45             | 40.2  | 755                              | 68.3 | <b>&lt; 0.001</b> |
| Thyroid cyst/nodule                    | 15             | 13.4  | 104                              | 9.4  | 0.181             |
| Underweight                            | 13             | 11.6  | 26                               | 2.4  | <b>&lt; 0.001</b> |
| <b>Gastrointestinal System*</b>        | 63             | 56.3  | 426                              | 38.5 | <b>&lt; 0.001</b> |
| Celiac (coeliac) disease               | 0              | 0.0   | 2                                | 0.2  | 1.000             |

|                                              |           |             |            |             |                   |
|----------------------------------------------|-----------|-------------|------------|-------------|-------------------|
| Cholecystitis                                | 11        | 9.8         | 92         | 8.3         | 0.592             |
| Constipation                                 | 3         | 2.7         | 16         | 1.4         | 0.409             |
| Dysphagia                                    | 5         | 4.5         | 30         | 2.7         | 0.365             |
| Enterocolitis                                | 3         | 2.7         | 21         | 1.9         | 0.479             |
| Esophageal stricture                         | 0         | 0.0         | 20         | 1.8         | 0.247             |
| Esophageal varices                           | 0         | 0.0         | 4          | 0.4         | 1.000             |
| Esophagitis                                  | 0         | 0.0         | 3          | 0.3         | 1.000             |
| Fecal incontinence                           | 1         | 0.9         | 4          | 0.4         | 0.383             |
| Fibrosis Cirrhosis                           | 7         | 6.3         | 24         | 2.2         | <b>0.019</b>      |
| Fistulas                                     | 0         | 0.0         | 3          | 0.3         | 1.000             |
| Gastritis/Duodenitis                         | 5         | 4.5         | 18         | 1.6         | 0.053             |
| Gastroesophageal reflux disease              | 23        | 20.5        | 155        | 14.0        | 0.068             |
| Gastrointestinal hemorrhage                  | 1         | 0.9         | 4          | 0.4         | 0.383             |
| Gastrointestinal obstruction                 | 3         | 2.7         | 3          | 0.3         | <b>0.012</b>      |
| Gastrointestinal ulcer                       | 3         | 2.7         | 5          | 0.5         | <b>0.030</b>      |
| Gastroparesis syndrome                       | 1         | 0.9         | 1          | 0.1         | 0.176             |
| Hepatic failure                              | 0         | 0.0         | 3          | 0.3         | 1.000             |
| Hepatopathy                                  | 41        | 36.6        | 216        | 19.5        | <b>&lt; 0.001</b> |
| Malabsorption syndrome                       | 0         | 0.0         | 1          | 0.1         | 1.000             |
| Pancreatic insufficiency                     | 0         | 0.0         | 1          | 0.1         | 1.000             |
| Pancreatitis                                 | 1         | 0.9         | 7          | 0.6         | 0.539             |
| Portal hypertension                          | 1         | 0.9         | 1          | 0.1         | 0.176             |
| Proctitis                                    | 0         | 0.0         | 3          | 0.3         | 1.000             |
| Steatohepatitis                              | 7         | 6.3         | 16         | 1.4         | <b>0.003</b>      |
| Veno-occlusive disease of liver              | 1         | 0.9         | 0          | 0.0         | 0.092             |
| <b>Hematology Conditions*</b>                | <b>12</b> | <b>10.7</b> | <b>92</b>  | <b>8.3</b>  | <b>0.375</b>      |
| Anemia                                       | 4         | 3.6         | 35         | 3.2         | 0.777             |
| Coagulopathy                                 | 0         | 0.0         | 1          | 0.1         | 1.000             |
| Hemochromatosis                              | 1         | 0.9         | 1          | 0.1         | 0.176             |
| Neutropenia                                  | 3         | 2.7         | 12         | 1.1         | 0.153             |
| Polycythemia                                 | 1         | 0.9         | 0          | 0.0         | 0.092             |
| Thrombocytopenia                             | 3         | 2.7         | 38         | 3.4         | 1.000             |
| Thrombocytosis                               | 1         | 0.9         | 11         | 1.0         | 1.000             |
| <b>Immunology and Infectious Conditions*</b> | <b>21</b> | <b>18.8</b> | <b>197</b> | <b>17.8</b> | <b>0.796</b>      |
| Autoimmune disorders                         | 1         | 0.9         | 8          | 0.7         | 0.582             |
| Chronic hepatitis C                          | 6         | 5.4         | 37         | 3.3         | 0.277             |
| Chronic active hepatitis B (PCR+)            | 1         | 0.9         | 1          | 0.1         | 0.176             |
| Endocarditis                                 | 0         | 0.0         | 1          | 0.1         | 1.000             |
| Gastrointestinal tract infection             | 4         | 3.6         | 35         | 3.2         | 0.777             |
| Genitourinary tract infection                | 0         | 0.0         | 10         | 0.9         | 0.612             |
| Human immunodeficiency virus infection       | 1         | 0.9         | 7          | 0.6         | 0.539             |
| Immunodeficiency                             | 1         | 0.9         | 0          | 0.0         | 0.092             |
| Lymphatic infection                          | 0         | 0.0         | 18         | 1.6         | 0.399             |
| Meningoencephalitis                          | 1         | 0.9         | 3          | 0.3         | 0.321             |
| Osteomyelitis                                | 0         | 0.0         | 2          | 0.2         | 1.000             |

|                                          |           |             |            |             |                   |
|------------------------------------------|-----------|-------------|------------|-------------|-------------------|
| Otitis Media                             | 1         | 0.9         | 14         | 1.3         | 1.000             |
| Sinopulmonary infection - Sinusitis      | 2         | 1.8         | 15         | 1.4         | 0.665             |
| Sinopulmonary infection - Bronchitis     | 0         | 0.0         | 2          | 0.2         | 1.000             |
| Soft tissue infection                    | 3         | 2.7         | 25         | 2.3         | 0.738             |
| Tonsillitis                              | 1         | 0.9         | 43         | 3.9         | 0.176             |
| <b>Musculoskeletal Conditions*</b>       | <b>88</b> | <b>78.6</b> | <b>684</b> | <b>61.8</b> | <b>&lt; 0.001</b> |
| Amputation                               | 2         | 1.8         | 6          | 0.5         | 0.163             |
| Arthralgia                               | 2         | 1.8         | 14         | 1.3         | 0.653             |
| Arthritis                                | 1         | 0.9         | 16         | 1.4         | 1.000             |
| BMD below expected range for age and sex | 67        | 59.8        | 479        | 43.3        | <b>0.001</b>      |
| Hernia                                   | 5         | 4.5         | 50         | 4.5         | 1.000             |
| Intervertebral disc disorder             | 8         | 7.1         | 99         | 9.0         | 0.603             |
| Kyphosis                                 | 1         | 0.9         | 2          | 0.2         | 0.252             |
| Limb length discrepancy                  | 1         | 0.9         | 5          | 0.5         | 0.440             |
| Osteonecrosis                            | 23        | 20.5        | 143        | 12.9        | <b>0.030</b>      |
| Palatal defects                          | 0         | 0.0         | 1          | 0.1         | 1.000             |
| Prosthetic malfunction                   | 1         | 0.9         | 4          | 0.4         | 0.383             |
| Scoliosis                                | 9         | 8.0         | 60         | 5.4         | 0.279             |
| Skeletal spine disorder                  | 4         | 3.6         | 43         | 3.9         | 1.000             |
| Slipped capital femoral epiphysis        | 1         | 0.9         | 2          | 0.2         | 0.252             |
| Temporomandibular joint disorder         | 2         | 1.8         | 9          | 0.8         | 0.268             |
| <b>Neurology Conditions*</b>             | <b>51</b> | <b>45.5</b> | <b>560</b> | <b>50.6</b> | <b>0.322</b>      |
| Autonomic nervous system disorder        | 0         | 0.0         | 3          | 0.3         | 1.000             |
| Cavernoma                                | 1         | 0.9         | 16         | 1.4         | 1.000             |
| Cerebellar dysfunction                   | 0         | 0.0         | 5          | 0.5         | 1.000             |
| Cerebrovascular accident                 | 3         | 2.7         | 34         | 3.1         | 1.000             |
| Cerebrovascular disease                  | 2         | 1.8         | 11         | 1.0         | 0.339             |
| Cranial nerve disorder                   | 0         | 0.0         | 17         | 1.5         | 0.392             |
| Dysarthria                               | 0         | 0.0         | 1          | 0.1         | 1.000             |
| Headaches                                | 16        | 14.3        | 209        | 18.9        | 0.253             |
| Intracranial hemorrhage                  | 2         | 1.8         | 12         | 1.1         | 0.374             |
| Movement disorders                       | 1         | 0.9         | 12         | 1.1         | 1.000             |
| Nerve root disorder                      | 0         | 0.0         | 14         | 1.3         | 0.631             |
| Neurogenic bladder                       | 0         | 0.0         | 5          | 0.5         | 1.000             |
| Neurogenic bowel                         | 0         | 0.0         | 1          | 0.1         | 1.000             |
| Paralytic disorder                       | 2         | 1.8         | 17         | 1.5         | 0.692             |
| Peripheral motor neuropathy              | 10        | 8.9         | 99         | 9.0         | 1.000             |
| Peripheral sensory neuropathy            | 34        | 30.4        | 359        | 32.5        | 0.673             |
| Pseudomeningocele                        | 0         | 0.0         | 1          | 0.1         | 1.000             |
| Pseudotumor cerebri                      | 0         | 0.0         | 3          | 0.3         | 1.000             |
| Seizure                                  | 11        | 9.8         | 90         | 8.1         | 0.588             |
| <b>Renal Conditions*</b>                 | <b>22</b> | <b>19.6</b> | <b>195</b> | <b>17.6</b> | <b>0.604</b>      |
| Acute kidney injury                      | 4         | 3.6         | 4          | 0.4         | <b>0.004</b>      |
| Chronic hematuria                        | 6         | 5.4         | 83         | 7.5         | 0.566             |
| Chronic kidney disease                   | 12        | 10.7        | 21         | 1.9         | <b>&lt; 0.001</b> |

|                                       |           |             |            |             |                   |
|---------------------------------------|-----------|-------------|------------|-------------|-------------------|
| Obstructive uropathy                  | 3         | 2.7         | 18         | 1.6         | 0.433             |
| Urinary bladder dysfunction           | 1         | 0.9         | 15         | 1.4         | 1.000             |
| Urinary incontinence                  | 2         | 1.8         | 20         | 1.8         | 1.000             |
| Urinary tract calculi (Urolithia)     | 1         | 0.9         | 63         | 5.7         | <b>0.025</b>      |
| Vesicoureteral reflux, acquired       | 0         | 0.0         | 1          | 0.1         | 1.000             |
| <b>Respiratory Conditions*</b>        | <b>83</b> | <b>74.1</b> | <b>296</b> | <b>26.8</b> | <b>&lt; 0.001</b> |
| Asthma                                | 16        | 14.3        | 108        | 9.8         | 0.140             |
| Chronic obstructive pulmonary disease | 0         | 0.0         | 7          | 0.6         | 1.000             |
| Epistaxis, chronic/recurrent          | 0         | 0.0         | 2          | 0.2         | 1.000             |
| Obstructive pulmonary deficit         | 58        | 51.8        | 123        | 11.1        | <b>&lt; 0.001</b> |
| Pleural space disorders               | 0         | 0.0         | 15         | 1.4         | 0.386             |
| Pneumonitis                           | 1         | 0.9         | 1          | 0.1         | 0.176             |
| Pulmonary diffusion deficits          | 63        | 56.3        | 136        | 12.3        | <b>&lt; 0.001</b> |
| Pulmonary embolism                    | 3         | 2.7         | 9          | 0.8         | 0.090             |
| Restrictive pulmonary deficit         | 36        | 32.1        | 62         | 5.6         | <b>&lt; 0.001</b> |
| Tracheal stenosis                     | 0         | 0.0         | 2          | 0.2         | 1.000             |
| <b>Reproductive Conditions*</b>       | <b>59</b> | <b>52.7</b> | <b>264</b> | <b>23.9</b> | <b>&lt; 0.001</b> |
| Central hypogonadism                  | 2         | 1.8         | 38         | 3.4         | 0.575             |
| Cervical dysplasia (females)          | 5         | 9.1         | 82         | 15.6        | 0.237             |
| Dyspareunia (females)                 | 1         | 1.8         | 1          | 0.2         | 0.181             |
| Endometriosis (females)               | 1         | 1.8         | 19         | 3.6         | 0.711             |
| Erectile dysfunction (males)          | 2         | 3.5         | 18         | 3.1         | 0.697             |
| Genitourinary adhesions (females)     | 0         | 0.0         | 12         | 2.3         | 0.616             |
| Polycystic ovarian syndrome (females) | 0         | 0.0         | 14         | 2.7         | 0.383             |
| Precocious puberty                    | 0         | 0.0         | 2          | 0.2         | 1.000             |
| Primary hypogonadism                  | 54        | 48.2        | 73         | 6.6         | <b>&lt; 0.001</b> |
| Prostatic hypertrophy (males)         | 0         | 0.0         | 1          | 0.2         | 1.000             |
| Uterine bleeding (females)            | 4         | 7.3         | 55         | 10.5        | 0.639             |
| Vaginal fistula (females)             | 0         | 0.0         | 1          | 0.2         | 1.000             |
| Vaginal stenosis (females)            | 0         | 0.0         | 1          | 0.2         | 1.000             |
| <b>Secondary Neoplasm*</b>            | <b>22</b> | <b>19.6</b> | <b>119</b> | <b>10.8</b> | <b>0.008</b>      |
| Central nervous system                | 3         | 2.7         | 24         | 2.2         | 0.732             |
| Carcinoma                             | 16        | 14.3        | 88         | 8.0         | <b>0.048</b>      |
| Hodgkin lymphoma                      | 0         | 0.0         | 2          | 0.2         | 1.000             |
| Leukemia                              | 3         | 2.7         | 3          | 0.3         | <b>0.012</b>      |
| Melanoma                              | 0         | 0.0         | 1          | 0.1         | 1.000             |
| Non-Hodgkin's lymphoma                | 1         | 0.9         | 0          | 0.0         | 0.092             |
| Sarcoma                               | 0         | 0.0         | 5          | 0.5         | 1.000             |
| <b>Audiology Conditions*</b>          |           |             |            |             |                   |
| Hearing loss                          | 21        | 18.8        | 63         | 5.7         | <b>&lt; 0.001</b> |
| <b>Ocular Conditions*</b>             | <b>78</b> | <b>69.6</b> | <b>220</b> | <b>19.9</b> | <b>&lt; 0.001</b> |
| Cataract                              | 75        | 67.0        | 158        | 14.3        | <b>&lt; 0.001</b> |
| Glaucoma                              | 5         | 4.5         | 11         | 1.0         | <b>0.002</b>      |
| Retinopathy                           | 9         | 8.0         | 72         | 6.5         | 0.537             |

Abbreviations: HCT, hematopoietic stem cell transplant; GHD, growth hormone deficiency; PCR, polymerase chain reaction. \* At least 1.

**Supplemental Table 4. Prevalence of grade 3-4 chronic conditions comparing HCT and conventional chemotherapy groups**

|                                     | HCT<br>(n=112) |      | Conventional<br>Therapy (n=1106) |      | p                 |
|-------------------------------------|----------------|------|----------------------------------|------|-------------------|
|                                     | n              | %    | n                                | %    |                   |
| <b>Any grade 3-4</b>                | 91             | 81.3 | 765                              | 69.2 | <b>0.007</b>      |
| <b>Cardiovascular conditions*</b>   | 22             | 19.6 | 113                              | 10.2 | <b>0.004</b>      |
| Arteriovenous malformation          | 0              | 0.0  | 1                                | 0.1  | 1.000             |
| Atrioventricular heart block        | 1              | 0.9  | 1                                | 0.1  | 0.176             |
| Cardiac dysrhythmia                 | 1              | 0.9  | 3                                | 0.3  | 0.321             |
| Cardiomyopathy                      | 3              | 2.7  | 25                               | 2.3  | 0.738             |
| Conduction abnormality              | 0              | 0.0  | 4                                | 0.4  | 1.000             |
| Dyslipidemia - Hypercholesterolemia | 2              | 1.8  | 6                                | 0.5  | 0.163             |
| Dyslipidemia - Hypertriglyceridemia | 9              | 8.0  | 16                               | 1.4  | <b>&lt; 0.001</b> |
| Heart valve disorder                | 1              | 0.9  | 4                                | 0.4  | 0.383             |
| Hypertension                        | 7              | 6.3  | 50                               | 4.5  | 0.354             |
| Myocardial infarction               | 3              | 2.7  | 24                               | 2.2  | 0.732             |
| Pericarditis                        | 0              | 0.0  | 1                                | 0.1  | 1.000             |
| Prolonged QT interval               | 0              | 0.0  | 3                                | 0.3  | 1.000             |
| Thrombus                            | 1              | 0.9  | 3                                | 0.3  | 0.321             |
| Vascular disease                    | 1              | 0.9  | 2                                | 0.2  | 0.252             |
| <b>Endocrine System*</b>            | 29             | 25.9 | 459                              | 41.5 | <b>0.001</b>      |
| Glucose metabolism                  | 13             | 11.6 | 74                               | 6.7  | 0.079             |
| Hyperparathyroidism                 | 0              | 0.0  | 1                                | 0.1  | 1.000             |
| Obesity                             | 18             | 16.1 | 423                              | 38.2 | <b>&lt; 0.001</b> |
| <b>Gastrointestinal System*</b>     | 22             | 19.6 | 131                              | 11.8 | <b>0.024</b>      |
| Cholecystitis                       | 7              | 6.3  | 72                               | 6.5  | 1.000             |
| Constipation                        | 0              | 0.0  | 1                                | 0.1  | 1.000             |
| Dysphagia                           | 1              | 0.9  | 7                                | 0.6  | 0.539             |
| Enterocolitis                       | 0              | 0.0  | 3                                | 0.3  | 1.000             |
| Esophageal stricture                | 0              | 0.0  | 18                               | 1.6  | 0.399             |
| Esophageal varices                  | 0              | 0.0  | 3                                | 0.3  | 1.000             |
| Esophagitis                         | 0              | 0.0  | 2                                | 0.2  | 1.000             |
| Fecal incontinence                  | 1              | 0.9  | 2                                | 0.2  | 0.252             |
| Fibrosis cirrhosis                  | 7              | 6.3  | 24                               | 2.2  | <b>0.019</b>      |
| Fistulas                            | 0              | 0.0  | 3                                | 0.3  | 1.000             |
| Gastritis/Duodenitis                | 2              | 1.8  | 11                               | 1.0  | 0.339             |
| Gastroesophageal reflux disease     | 1              | 0.9  | 2                                | 0.2  | 0.252             |
| Gastrointestinal hemorrhage         | 1              | 0.9  | 4                                | 0.4  | 0.383             |
| Gastrointestinal obstruction        | 3              | 2.7  | 2                                | 0.2  | <b>0.007</b>      |
| Gastrointestinal ulcer              | 2              | 1.8  | 3                                | 0.3  | 0.070             |
| Hepatic failure                     | 0              | 0.0  | 3                                | 0.3  | 1.000             |
| Hepatopathy                         | 2              | 1.8  | 2                                | 0.2  | <b>0.045</b>      |
| Pancreatitis                        | 1              | 0.9  | 7                                | 0.6  | 0.539             |

|                                              |    |      |     |      |              |
|----------------------------------------------|----|------|-----|------|--------------|
| Veno-occlusive disease of liver              | 1  | 0.9  | 0   | 0.0  | 0.092        |
| <b>Hematology Conditions*</b>                | 0  | 0    | 5   | 0.5  | 1.000        |
| Anemia                                       | 0  | 0.0  | 3   | 0.3  | 1.000        |
| Coagulopathy                                 | 0  | 0.0  | 1   | 0.1  | 1.000        |
| Thrombocytopenia                             | 0  | 0.0  | 1   | 0.1  | 1.000        |
| <b>Immunology and Infectious Conditions*</b> | 16 | 14.3 | 160 | 14.5 | 1.000        |
| Chronic hepatitis C                          | 5  | 4.5  | 19  | 1.7  | 0.062        |
| Chronic active hepatitis B (PCR+)            | 1  | 0.9  | 0   | 0.0  | 0.092        |
| Endocarditis                                 | 0  | 0.0  | 1   | 0.1  | 1.000        |
| Gastrointestinal tract infection             | 4  | 3.6  | 35  | 3.2  | 0.777        |
| Genitourinary tract infection                | 0  | 0.0  | 5   | 0.5  | 1.000        |
| Lymphatic infection                          | 0  | 0.0  | 18  | 1.6  | 0.399        |
| Meningoencephalitis                          | 1  | 0.9  | 3   | 0.3  | 0.321        |
| Osteomyelitis                                | 0  | 0.0  | 2   | 0.2  | 1.000        |
| Otitis Media                                 | 1  | 0.9  | 11  | 1.0  | 1.000        |
| Sinopulmonary infection - Sinusitis          | 2  | 1.8  | 14  | 1.3  | 0.653        |
| Sinopulmonary infection - Bronchitis         | 0  | 0.0  | 2   | 0.2  | 1.000        |
| Soft tissue infection                        | 2  | 1.8  | 20  | 1.8  | 1.000        |
| Tonsillitis                                  | 1  | 0.9  | 43  | 3.9  | 0.176        |
| <b>Musculoskeletal Conditions*</b>           | 14 | 12.5 | 108 | 9.8  | 0.326        |
| Amputation                                   | 1  | 0.9  | 1   | 0.1  | 0.176        |
| Hernia                                       | 3  | 2.7  | 49  | 4.4  | 0.621        |
| Intervertebral disc disorder                 | 0  | 0.0  | 20  | 1.8  | 0.247        |
| Kyphosis                                     | 0  | 0.0  | 1   | 0.1  | 1.000        |
| Limb length discrepancy                      | 1  | 0.9  | 0   | 0.0  | 0.092        |
| Osteonecrosis                                | 8  | 7.1  | 34  | 3.1  | <b>0.049</b> |
| Prosthetic malfunction                       | 1  | 0.9  | 4   | 0.4  | 0.383        |
| Scoliosis                                    | 0  | 0.0  | 3   | 0.3  | 1.000        |
| Skeletal spine disorder                      | 1  | 0.9  | 2   | 0.2  | 0.252        |
| Slipped capital femoral epiphysis            | 1  | 0.9  | 2   | 0.2  | 0.252        |
| Temporomandibular joint disorder             | 1  | 0.9  | 3   | 0.3  | 0.321        |
| <b>Neurology Conditions*</b>                 | 10 | 8.9  | 99  | 9.0  | 1.000        |
| Cerebrovascular accident                     | 2  | 1.8  | 19  | 1.7  | 1.000        |
| Cerebrovascular disease                      | 1  | 0.9  | 1   | 0.1  | 0.176        |
| Cranial nerve disorder                       | 0  | 0.0  | 1   | 0.1  | 1.000        |
| Headaches                                    | 3  | 2.7  | 26  | 2.4  | 0.744        |
| Intracranial hemorrhage                      | 0  | 0.0  | 5   | 0.5  | 1.000        |
| Nerve root disorder                          | 0  | 0.0  | 3   | 0.3  | 1.000        |
| Neurogenic bladder                           | 0  | 0.0  | 4   | 0.4  | 1.000        |
| Neurogenic bowel                             | 0  | 0.0  | 1   | 0.1  | 1.000        |
| Paralytic disorder                           | 0  | 0.0  | 3   | 0.3  | 1.000        |
| Peripheral motor neuropathy                  | 0  | 0.0  | 16  | 1.4  | 0.388        |
| Peripheral sensory neuropathy                | 0  | 0.0  | 17  | 1.5  | 0.392        |
| Pseudotumor cerebri                          | 0  | 0.0  | 2   | 0.2  | 1.000        |
| Seizure                                      | 4  | 3.6  | 32  | 2.9  | 0.566        |



|                                       |    |      |    |     |              |
|---------------------------------------|----|------|----|-----|--------------|
| <b>Renal Conditions*</b>              | 4  | 3.6  | 57 | 5.2 | 0.649        |
| Acute kidney injury                   | 1  | 0.9  | 2  | 0.2 | 0.252        |
| Chronic kidney disease                | 1  | 0.9  | 11 | 1.0 | 1.000        |
| Obstructive uropathy                  | 2  | 1.8  | 6  | 0.5 | 0.163        |
| Urinary bladder dysfunction           | 0  | 0.0  | 3  | 0.3 | 1.000        |
| Urinary incontinence                  | 0  | 0.0  | 3  | 0.3 | 1.000        |
| Urinary tract calculi (Urolithia)     | 1  | 0.9  | 34 | 3.1 | 0.246        |
| <b>Respiratory Conditions*</b>        | 18 | 16.1 | 51 | 4.6 | < 0.001      |
| Asthma                                | 1  | 0.9  | 11 | 2.2 | 0.701        |
| Chronic obstructive pulmonary disease | 0  | 0.0  | 1  | 0.2 | 1.000        |
| Obstructive pulmonary deficit         | 11 | 9.8  | 21 | 4.1 | <b>0.013</b> |
| Pleural space disorders               | 0  | 0.0  | 5  | 1.0 | 0.596        |
| Pneumonitis                           | 1  | 0.9  | 0  | 0.0 | 0.168        |
| Pulmonary diffusion deficits          | 7  | 6.3  | 10 | 2.0 | <b>0.014</b> |
| Pulmonary embolism                    | 3  | 2.7  | 9  | 1.8 | 0.435        |
| Restrictive pulmonary deficit         | 9  | 8.0  | 10 | 2.0 | <b>0.002</b> |
| <b>Reproductive Conditions*</b>       | 36 | 32.1 | 97 | 8.8 | < 0.001      |
| Cervical dysplasia (females)          | 3  | 5.5  | 39 | 7.4 | 0.787        |
| Dyspareunia (females)                 | 1  | 1.8  | 1  | 0.2 | 0.181        |
| Endometriosis (females)               | 1  | 1.8  | 17 | 3.2 | 1.000        |
| Erectile dysfunction (males)          | 1  | 1.8  | 0  | 0.0 | 0.089        |
| Genitourinary adhesions (females)     | 0  | 0.0  | 12 | 2.3 | 0.616        |
| Primary hypogonadism                  | 34 | 30.4 | 34 | 3.1 | < 0.001      |
| Uterine bleeding (females)            | 1  | 1.8  | 26 | 5.0 | 0.500        |
| Vaginal fistula (females)             | 0  | 0.0  | 1  | 0.2 | 1.000        |
| <b>Secondary Neoplasm*</b>            | 19 | 17.0 | 87 | 7.9 | <b>0.003</b> |
| Central nervous system                | 2  | 1.8  | 19 | 1.7 | 1.000        |
| Carcinoma                             | 13 | 11.6 | 60 | 5.4 | <b>0.019</b> |
| Hodgkin lymphoma                      | 0  | 0.0  | 2  | 0.2 | 1.000        |
| Leukemia                              | 3  | 2.7  | 3  | 0.3 | <b>0.012</b> |
| Melanoma                              | 0  | 0.0  | 1  | 0.1 | 1.000        |
| Non-Hodgkin's lymphoma                | 1  | 0.9  | 0  | 0.0 | 0.092        |
| Sarcoma                               | 0  | 0.0  | 5  | 0.5 | 1.000        |
| <b>Audiology Conditions*</b>          |    |      |    |     |              |
| Hearing loss                          | 5  | 4.5  | 19 | 1.7 | <b>0.046</b> |
| <b>Ocular Conditions*</b>             | 24 | 21.4 | 15 | 1.4 | < 0.001      |
| Cataract                              | 23 | 20.5 | 7  | 0.6 | < 0.001      |
| Glaucoma                              | 1  | 0.9  | 0  | 0.0 | 0.092        |
| Retinopathy                           | 2  | 1.8  | 9  | 0.8 | 0.268        |

Abbreviations: HCT, hematopoietic stem cell transplant; PCR, polymerase chain reaction. \* At least 1.

**Supplemental Table 5. Association between the use of TBI and grade 3-4 chronic conditions and frail health**

| Outcome                          | OR   | TBI vs non-TBI |        | p            |
|----------------------------------|------|----------------|--------|--------------|
|                                  |      | 95% CI         |        |              |
| Frail health                     | 6.96 | 0.37           | 130.30 | 0.194        |
| Any Grade 3-4 conditions         | 4.07 | 1.52           | 10.92  | <b>0.005</b> |
| Grade 3-4 cardiac conditions     | 1.69 | 0.54           | 5.29   | 0.368        |
| Grade 3-4 respiratory conditions | 2.83 | 0.68           | 11.73  | 0.152        |
| Grade 3-4 SN                     | 1.95 | 0.56           | 6.83   | 0.297        |

Abbreviations: TBI, total body irradiation; OR, odds ratio; CI, confidence interval; SN, second neoplasms.

**Supplemental Table 6. Mean cumulative count of chronic medical conditions among HCT and conventional chemotherapy survivors at 25 years of age per 100 patients**

|                                        | Grade 1 to 4 |                      | Grade 3 to 4 |                      |
|----------------------------------------|--------------|----------------------|--------------|----------------------|
|                                        | HCT          | Conventional Therapy | HCT          | Conventional Therapy |
| <b>Cardiovascular Conditions</b>       |              |                      |              |                      |
| Aortic root aneurysm                   | 0            | 0                    | 0            | 0                    |
| Arteriovenous malformation (AVM)       | 0            | 0                    | 0            | 0                    |
| Atrial myxoma                          | 0            | 0                    | 0            | 0                    |
| Atrioventricular heart block           | 1            | 0                    | 1            | 0                    |
| Cardiac dysrhythmia                    | 3            | 0                    | 2            | 0                    |
| Cardiomyopathy                         | 4            | 2                    | 1            | 1                    |
| Conduction abnormality                 | 8            | 7                    | 0            | 0                    |
| Dyslipidemia - Hypercholesterolemia    | 22           | 12                   | 0            | 0                    |
| Dyslipidemia - Hypertriglyceridemia    | 27           | 11                   | 1            | 0                    |
| Heart valve disorder                   | 7            | 8                    | 1            | 0                    |
| Hypertension                           | 33           | 16                   | 2            | 0                    |
| Myocardial infarction                  | 1            | 0                    | 1            | 0                    |
| Pericarditis                           | 0            | 0                    | 0            | 0                    |
| Prolonged QT interval                  | 2            | 1                    | 0            | 0                    |
| Pulmonary hypertension                 | 0            | 0                    | 0            | 0                    |
| Raynaud's phenomenon                   | 2            | 1                    | 0            | 0                    |
| Right ventricular systolic dysfunction | 0            | 0                    | 0            | 0                    |
| Sinus bradycardia                      | 1            | 1                    | 0            | 0                    |
| Sinus tachycardia                      | 4            | 1                    | 0            | 0                    |
| Thrombus                               | 2            | 0                    | 1            | 0                    |
| Vascular disease                       | 2            | 0                    | 2            | 0                    |
| <b>Endocrine System</b>                |              |                      |              |                      |
| Adrenal insufficiency                  | 7            | 2                    | 0            | 0                    |
| Adult GHD                              | 13           | 6                    | 0            | 0                    |
| Childhood GHD                          | 14           | 5                    | 0            | 0                    |
| Glucose metabolism                     | 12           | 5                    | 4            | 0                    |
| Hyperparathyroidism                    | 0            | 0                    | 0            | 0                    |
| Hyperprolactinemia                     | 1            | 0                    | 0            | 0                    |
| Hyperthyroidism                        | 0            | 0                    | 0            | 0                    |
| Hypoparathyroidism                     | 0            | 0                    | 0            | 0                    |
| Hypothyroidism                         | 48           | 17                   | 0            | 0                    |
| Hypothyroidism compensated             | 0            | 0                    | 0            | 0                    |
| Obesity                                | 10           | 17                   | 5            | 8                    |
| Thyroid cyst/nodule                    | 13           | 2                    | 0            | 0                    |
| Underweight                            | 6            | 1                    | 0            | 0                    |

| <b>Gastrointestinal System</b>              |    |   |   |   |
|---------------------------------------------|----|---|---|---|
| Celiac (coeliac) disease                    | 0  | 0 | 0 | 0 |
| Cholecystitis                               | 7  | 3 | 6 | 2 |
| Constipation                                | 3  | 1 | 0 | 0 |
| Dysphagia                                   | 3  | 1 | 0 | 0 |
| Enterocolitis                               | 0  | 1 | 0 | 0 |
| Esophageal stricture                        | 0  | 0 | 0 | 0 |
| Esophageal varices                          | 0  | 0 | 0 | 0 |
| Esophagitis                                 | 0  | 0 | 0 | 0 |
| Fecal incontinence                          | 1  | 0 | 1 | 0 |
| Fibrosis cirrhosis                          | 4  | 1 | 4 | 1 |
| Fistulas                                    | 0  | 0 | 0 | 0 |
| Gastritis/Duodenitis                        | 1  | 1 | 1 | 0 |
| Gastroesophageal reflux disease             | 4  | 4 | 0 | 0 |
| Gastrointestinal hemorrhage                 | 1  | 0 | 1 | 0 |
| Gastrointestinal obstruction                | 3  | 0 | 3 | 0 |
| Gastrointestinal ulcer                      | 2  | 0 | 1 | 0 |
| Gastroparesis syndrome                      | 1  | 0 | 0 | 0 |
| Hepatic failure                             | 0  | 0 | 0 | 0 |
| Hepatopathy                                 | 12 | 4 | 0 | 0 |
| Malabsorption syndrome                      | 0  | 0 | 0 | 0 |
| Pancreatic insufficiency                    | 0  | 0 | 0 | 0 |
| Pancreatitis                                | 1  | 0 | 1 | 0 |
| Portal hypertension                         | 1  | 0 | 0 | 0 |
| Proctitis                                   | 0  | 0 | 0 | 0 |
| Steatohepatitis                             | 1  | 0 | 0 | 0 |
| Veno-occlusive disease of liver             | 1  | 0 | 1 | 0 |
| <b>Hematology Conditions</b>                |    |   |   |   |
| Anemia                                      | 3  | 1 | 0 | 0 |
| Coagulopathy                                | 0  | 0 | 0 | 0 |
| Hemochromatosis                             | 0  | 0 | 0 | 0 |
| Neutropenia                                 | 1  | 0 | 0 | 0 |
| Polycythemia                                | 0  | 0 | 0 | 0 |
| Thrombocytopenia                            | 1  | 2 | 0 | 0 |
| Thrombocytosis                              | 1  | 0 | 0 | 0 |
| <b>Immunology and Infectious Conditions</b> |    |   |   |   |
| Autoimmune disorders                        | 0  | 0 | 0 | 0 |
| Chronic hepatitis C                         | 4  | 3 | 4 | 1 |
| Chronic active hepatitis B (PCR+)           | 1  | 0 | 1 | 0 |
| Endocarditis                                | 0  | 0 | 0 | 0 |
| Gastrointestinal tract infection            | 3  | 2 | 3 | 2 |
| Genitourinary tract infection               | 0  | 1 | 0 | 0 |
| Human immunodeficiency virus infection      | 1  | 0 | 0 | 0 |

|                                      |   |   |   |   |
|--------------------------------------|---|---|---|---|
| Immunodeficiency                     | 1 | 0 | 0 | 0 |
| Lymphatic infection                  | 0 | 0 | 0 | 0 |
| Meningoencephalitis                  | 1 | 0 | 1 | 0 |
| Osteomyelitis                        | 0 | 0 | 0 | 0 |
| Otitis Media                         | 0 | 1 | 0 | 1 |
| Sinopulmonary infection - Sinusitis  | 2 | 1 | 1 | 1 |
| Sinopulmonary infection - Bronchitis | 0 | 0 | 0 | 0 |
| Soft tissue infection                | 2 | 1 | 1 | 1 |
| Tonsillitis                          | 1 | 3 | 1 | 3 |

### **Musculoskeletal Conditions**

|                                          |    |    |   |   |
|------------------------------------------|----|----|---|---|
| Amputation                               | 4  | 0  | 2 | 0 |
| Arthralgia                               | 0  | 0  | 0 | 0 |
| Arthritis                                | 0  | 0  | 0 | 0 |
| BMD below expected range for age and sex | 22 | 13 | 0 | 0 |
| Hernia                                   | 1  | 1  | 0 | 1 |
| Intervertebral disc disorder             | 4  | 3  | 0 | 1 |
| Kyphosis                                 | 0  | 0  | 0 | 0 |
| Limb length discrepancy                  | 1  | 0  | 1 | 0 |
| Osteonecrosis                            | 25 | 19 | 7 | 6 |
| Palatal defects                          | 0  | 0  | 0 | 0 |
| Prosthetic malfunction                   | 0  | 0  | 0 | 0 |
| Scoliosis                                | 4  | 5  | 0 | 1 |
| Skeletal spine disorder                  | 2  | 1  | 1 | 0 |
| Slipped capital femoral epiphysis        | 1  | 0  | 1 | 0 |
| Temporomandibular joint disorder         | 2  | 0  | 1 | 0 |

### **Neurology Conditions**

|                                   |    |    |   |   |
|-----------------------------------|----|----|---|---|
| Autonomic nervous system disorder | 0  | 0  | 0 | 0 |
| Cavernoma                         | 1  | 0  | 0 | 0 |
| Cerebellar dysfunction            | 0  | 0  | 0 | 0 |
| Cerebrovascular accident          | 2  | 1  | 1 | 0 |
| Cerebrovascular disease           | 1  | 0  | 0 | 0 |
| Cranial nerve disorder            | 0  | 1  | 0 | 0 |
| Dysarthria                        | 0  | 0  | 0 | 0 |
| Headaches                         | 10 | 12 | 2 | 1 |
| Intracranial hemorrhage           | 0  | 0  | 0 | 0 |
| Movement disorders                | 0  | 1  | 0 | 0 |
| Nerve root disorder               | 0  | 0  | 0 | 0 |
| Neurogenic bladder                | 0  | 0  | 0 | 0 |
| Neurogenic bowel                  | 0  | 0  | 0 | 0 |
| Paralytic disorder                | 0  | 1  | 0 | 0 |
| Peripheral motor neuropathy       | 2  | 1  | 0 | 0 |
| Peripheral sensory neuropathy     | 5  | 4  | 0 | 0 |

|                                       |    |    |    |   |
|---------------------------------------|----|----|----|---|
| Pseudomeningocele                     | 0  | 0  | 0  | 0 |
| Psuedotumor cerebri                   | 0  | 0  | 0  | 0 |
| Seizure                               | 8  | 8  | 3  | 2 |
| <b>Renal Conditions</b>               |    |    |    |   |
| Acute kidney injury                   | 3  | 0  | 1  | 0 |
| Chronic hematuria                     | 1  | 2  | 0  | 0 |
| Chronic kidney disease                | 3  | 1  | 1  | 1 |
| Obstructive uropathy                  | 0  | 0  | 0  | 0 |
| Urinary bladder dysfunction           | 0  | 0  | 0  | 0 |
| Urinary incontinence                  | 0  | 0  | 0  | 0 |
| Urinary tract calculi (Urolithia)     | 1  | 2  | 1  | 1 |
| Vesicoureteral reflux, acquired       | 0  | 0  | 0  | 0 |
| <b>Respiratory Conditions</b>         |    |    |    |   |
| Asthma                                | 14 | 8  | 1  | 0 |
| Chronic obstructive pulmonary disease | 0  | 0  | 0  | 0 |
| Epistaxis, chronic/recurrent          | 0  | 0  | 0  | 0 |
| Obstructive pulmonary deficit         | 19 | 1  | 4  | 0 |
| Pleural space disorders               | 0  | 1  | 0  | 0 |
| Pneumonitis                           | 0  | 0  | 0  | 0 |
| Pulmonary diffusion deficits          | 22 | 2  | 1  | 0 |
| Pulmonary embolism                    | 1  | 0  | 1  | 0 |
| Restrictive pulmonary deficit         | 12 | 1  | 4  | 0 |
| Tracheal stenosis                     | 0  | 0  | 0  | 0 |
| <b>Reproductive Conditions</b>        |    |    |    |   |
| Central hypogonadism                  | 1  | 1  | 0  | 0 |
| Cervical dysplasia                    | 10 | 13 | 8  | 6 |
| Dyspareunia                           | 0  | 0  | 0  | 0 |
| Endometriosis                         | 0  | 2  | 0  | 2 |
| Erectile dysfunction                  | 0  | 0  | 0  | 0 |
| Genitourinary adhesions               | 0  | 0  | 0  | 0 |
| Polycystic ovarian syndrome           | 0  | 2  | 0  | 0 |
| Precocious puberty                    | 0  | 0  | 0  | 0 |
| Primary hypogonadism                  | 35 | 3  | 21 | 1 |
| Prostatic hypertrophy                 | 0  | 0  | 0  | 0 |
| Uterine bleeding                      | 0  | 4  | 0  | 0 |
| Vaginal fistula                       | 0  | 0  | 0  | 0 |
| Vaginal stenosis                      | 0  | 0  | 0  | 0 |
| <b>Secondary Neoplasm</b>             |    |    |    |   |
| CNS                                   | 0  | 1  | 0  | 1 |
| Carcinoma                             | 5  | 1  | 5  | 1 |
| Hodgkin lymphoma                      | 0  | 0  | 0  | 0 |
| Leukemia                              | 4  | 0  | 4  | 0 |
| Melanoma                              | 0  | 0  | 0  | 0 |

|                             |            |            |            |           |
|-----------------------------|------------|------------|------------|-----------|
| Non-Hodgkin's lymphoma      | 0          | 0          | 0          | 0         |
| Sarcoma                     | 0          | 0          | 0          | 0         |
| <b>Audiology Conditions</b> |            |            |            |           |
| Hearing Loss                | 14         | 4          | 4          | 1         |
| <b>Ocular Conditions</b>    |            |            |            |           |
| Cataract                    | 59         | 5          | 27         | 1         |
| Glaucoma                    | 3          | 0          | 0          | 0         |
| Retinopathy                 | 1          | 2          | 0          | 0         |
| <b>All conditions</b>       | <b>609</b> | <b>283</b> | <b>148</b> | <b>60</b> |

# SUPPLEMENTAL FIGURE

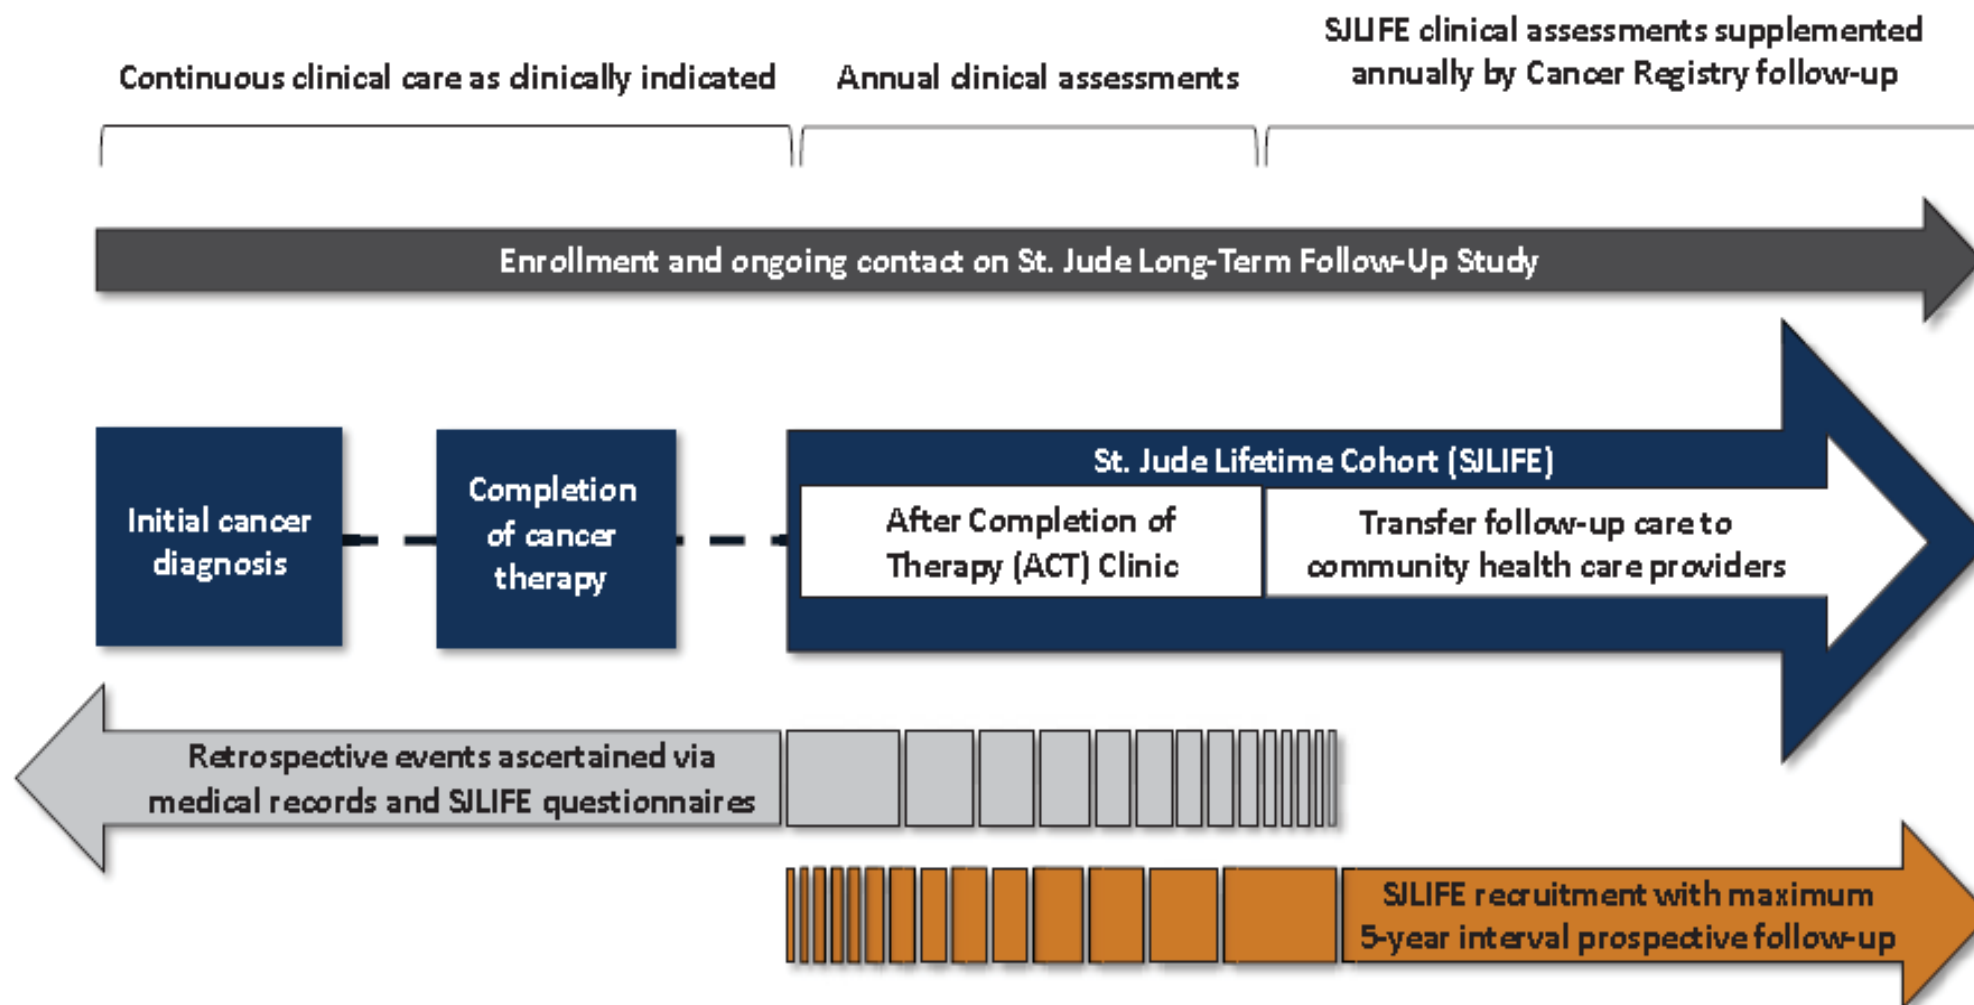

Supplement: ba010280-suppl1.pdf [file ba010280-suppl1.pdf]
